# Supplementary material for: Exploring chromatin hierarchical organization via Markov State Modelling
Source: PubMed Central journal article supplement (PMC6355033; doi:10.1371/journal.pcbi.1006686), 2018-12-31

**A**H3K9Ac ( $r=0.374$ ,  $p<1e-300$ )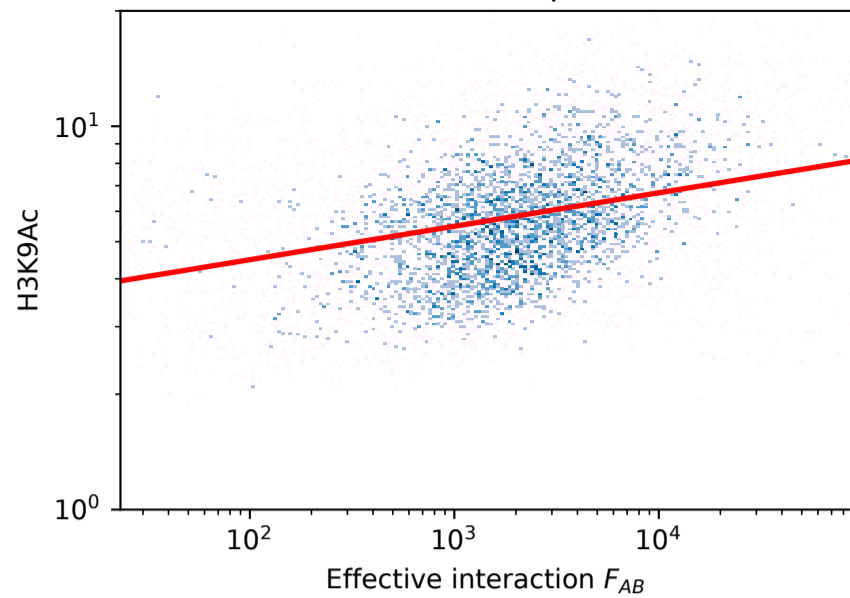H3K9Me3 ( $r=-0.306$ ,  $p=9.1e-201$ )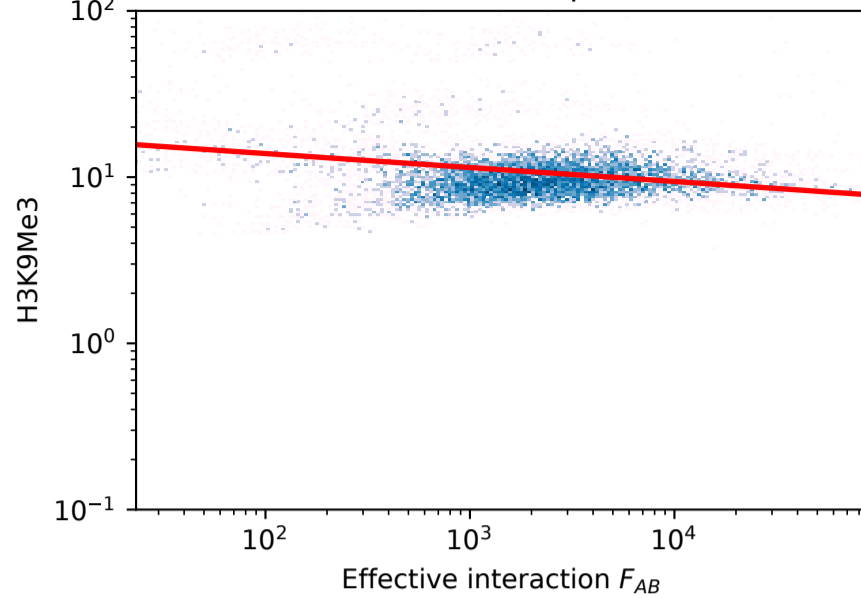H3K27Ac ( $r=0.464$ ,  $p<1e-300$ )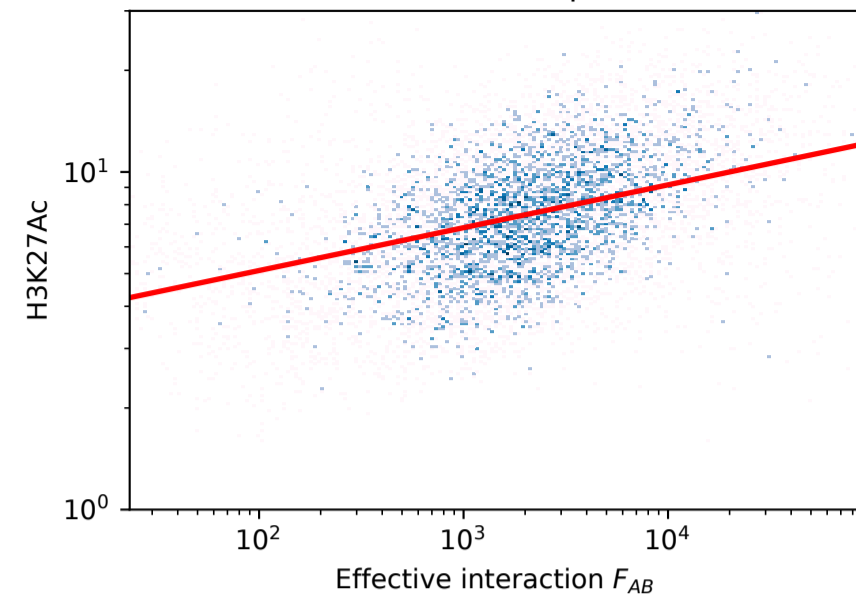H3K27Me3 ( $r=-0.110$ ,  $p=2.2e-26$ )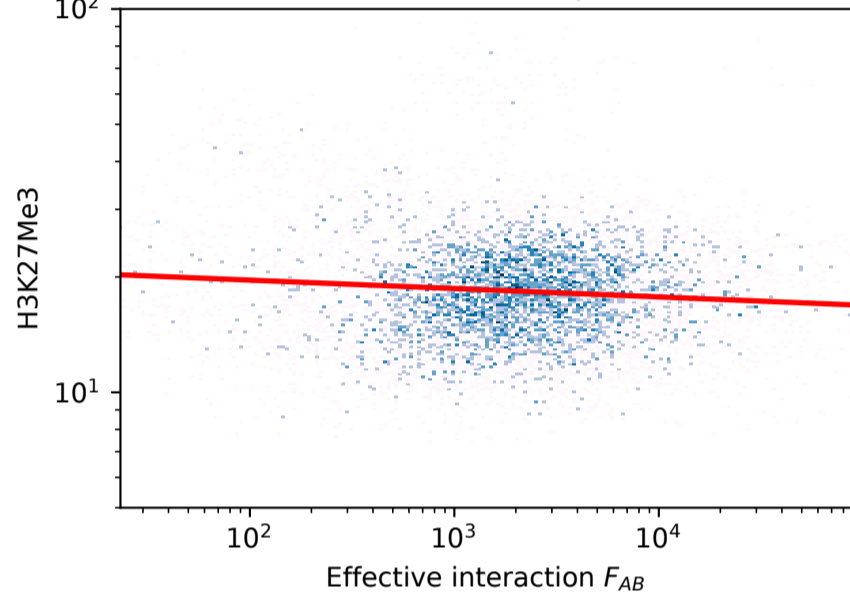H3K4Me1 ( $r=0.342$ ,  $p=2.2e-254$ )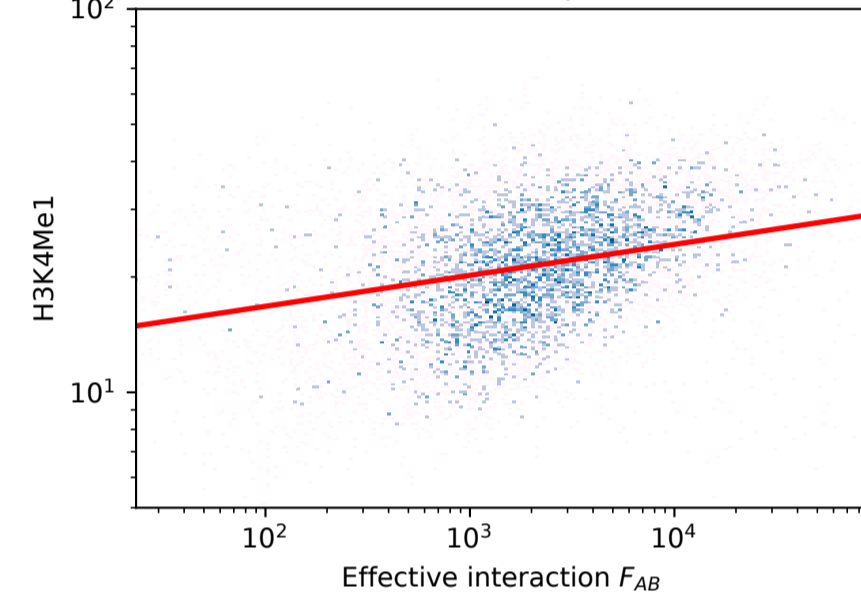H3K4Me3 ( $r=0.113$ ,  $p=8.1e-28$ )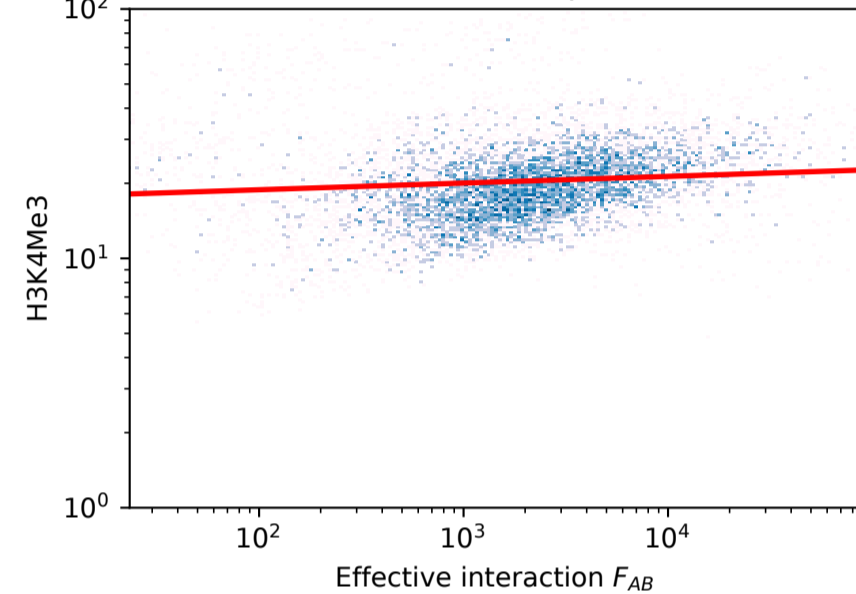CTCF ( $r=0.547$ ,  $p<1e-300$ )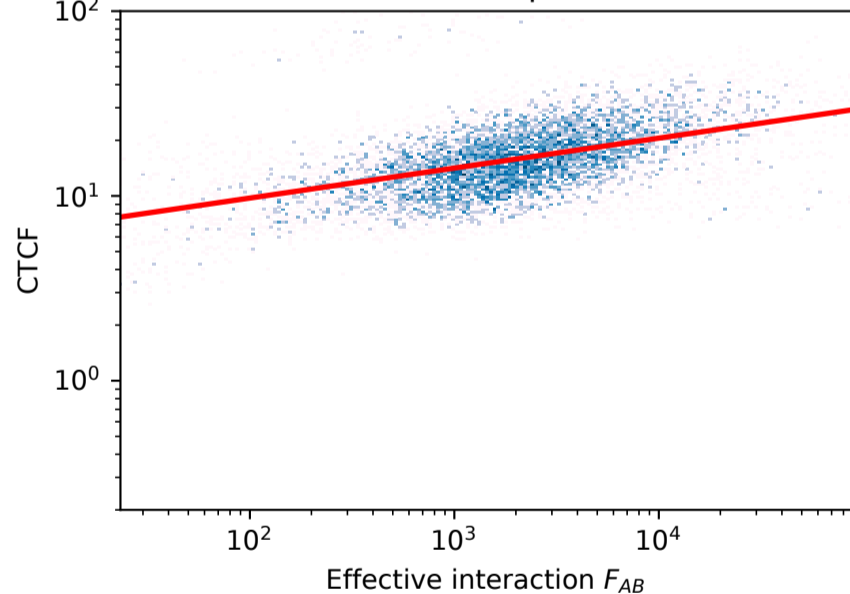RAD21 ( $r=0.330$ ,  $p=1.8e-235$ )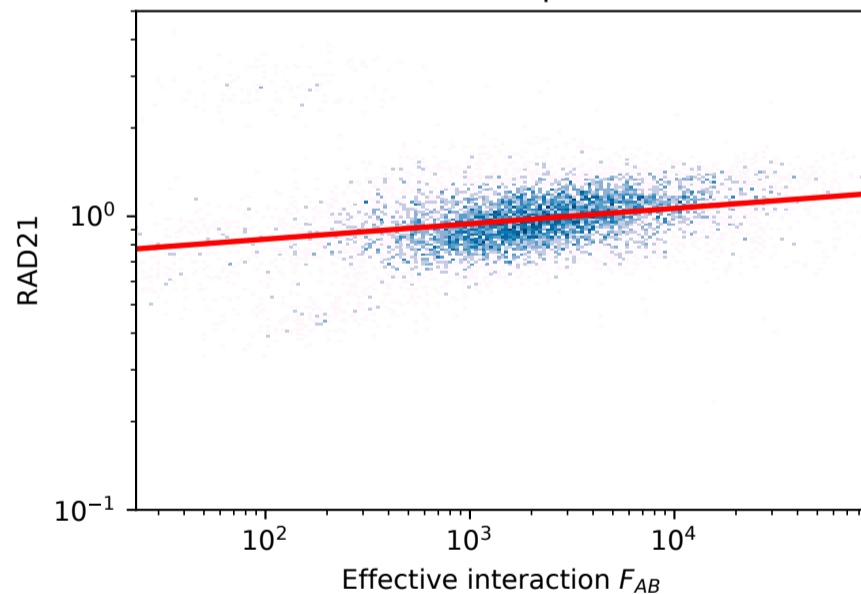POL2 ( $r=0.358$ ,  $p=1.1e-279$ )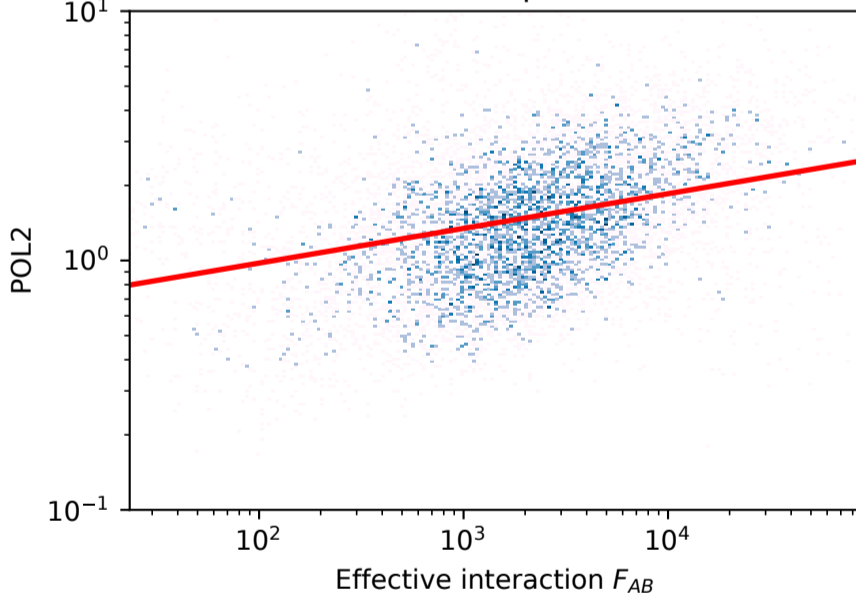POL3 ( $r=-0.138$ ,  $p=5.8e-41$ )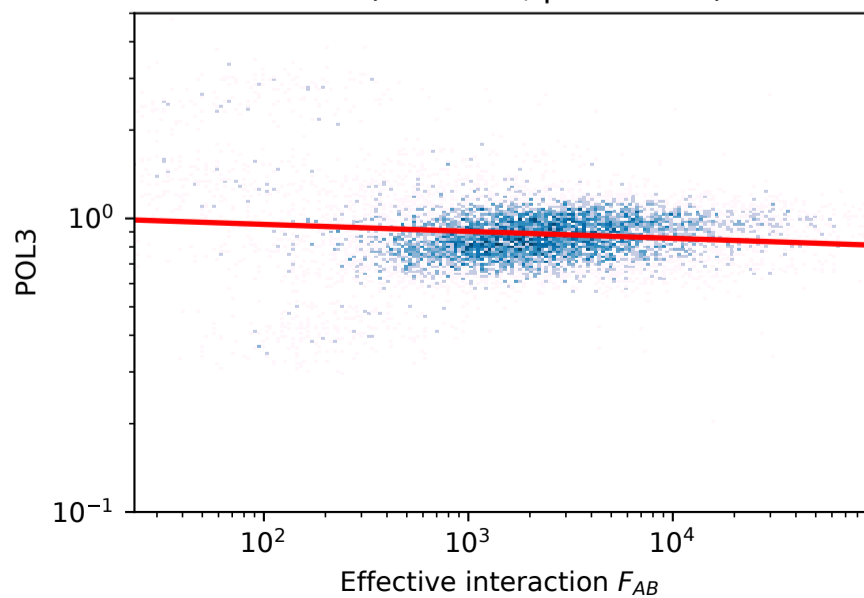DNA accessibility ( $r=0.708$ ,  $p<1e-300$ )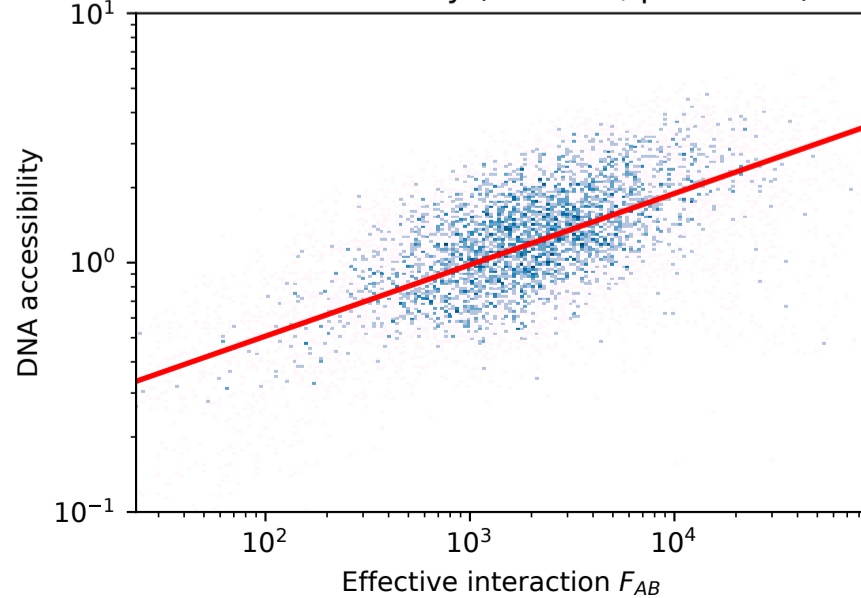

**B**H3K9Ac ( $r=0.227$ ,  $p=5.2e-51$ )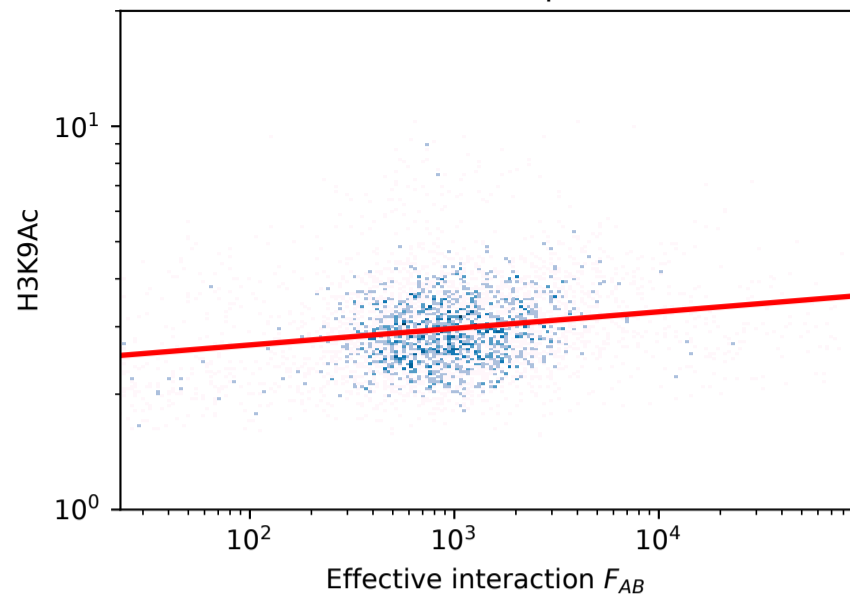H3K9Me3 ( $r=0.009$ ,  $p=5.4e-01$ )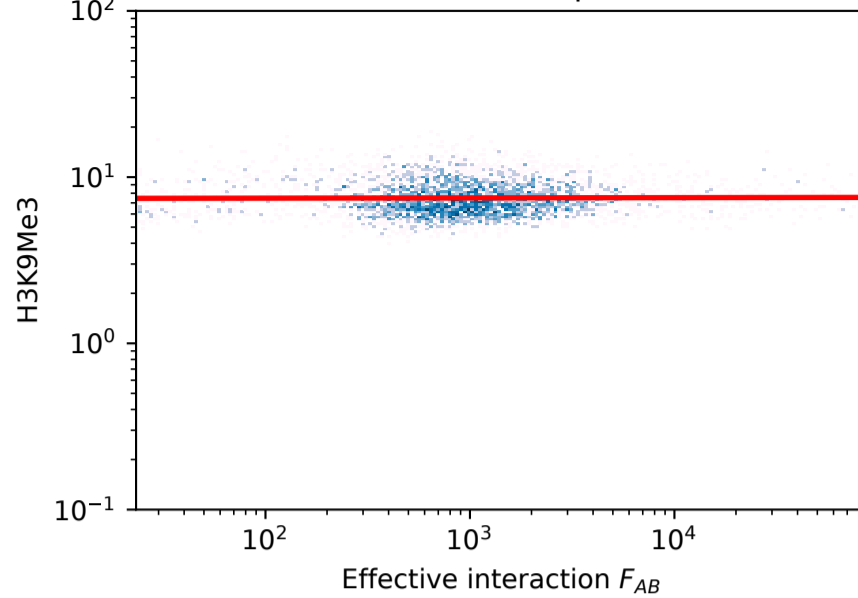H3K27Ac ( $r=0.207$ ,  $p=2.0e-42$ )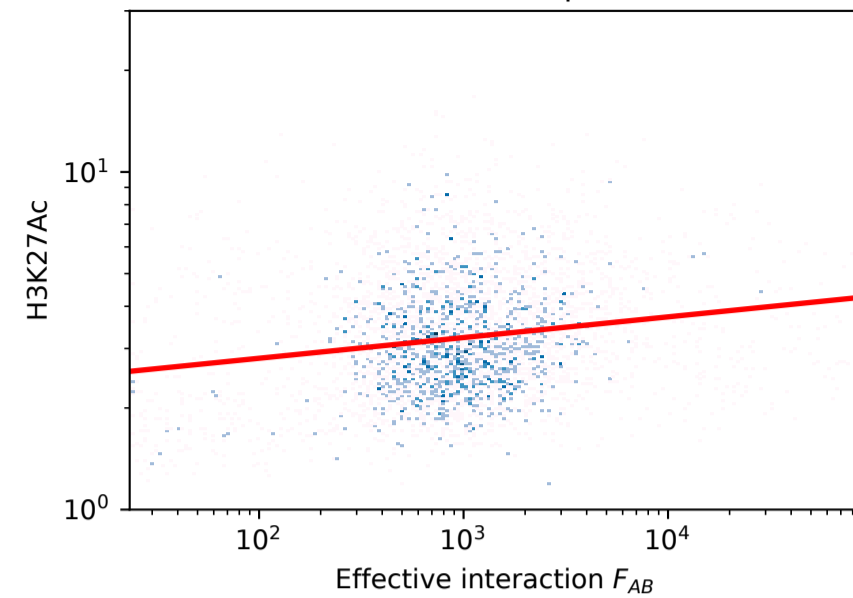H3K27Me3 ( $r=0.128$ ,  $p=3.9e-17$ )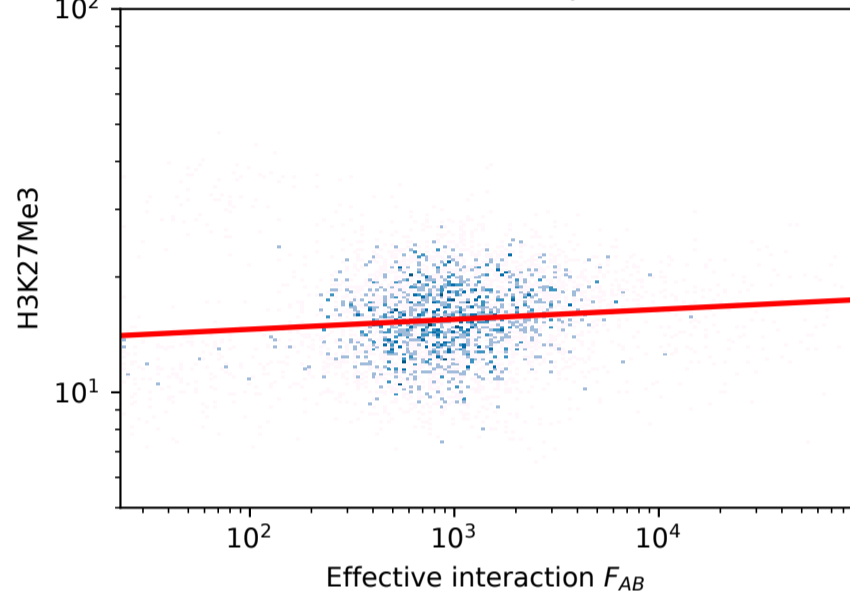H3K4Me1 ( $r=0.315$ ,  $p=2.3e-99$ )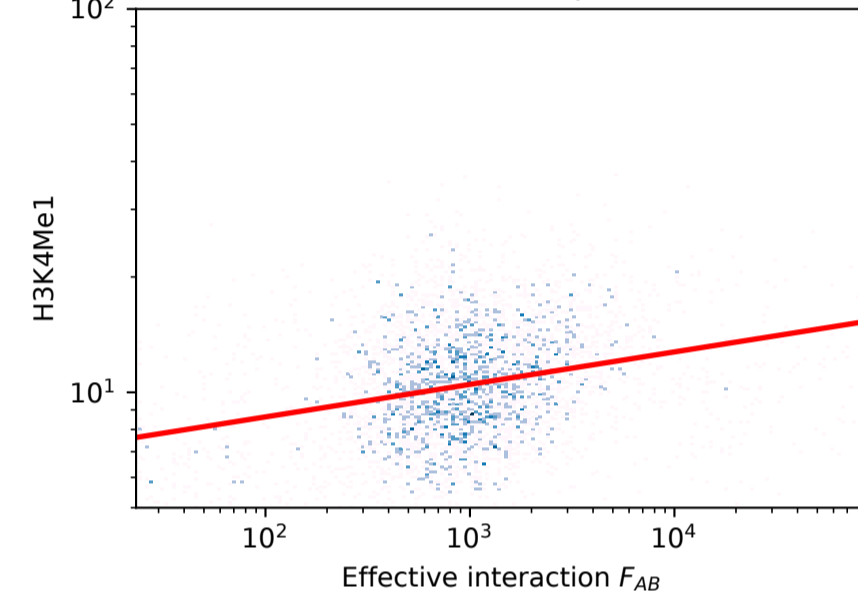H3K4Me3 ( $r=0.207$ ,  $p=8.9e-43$ )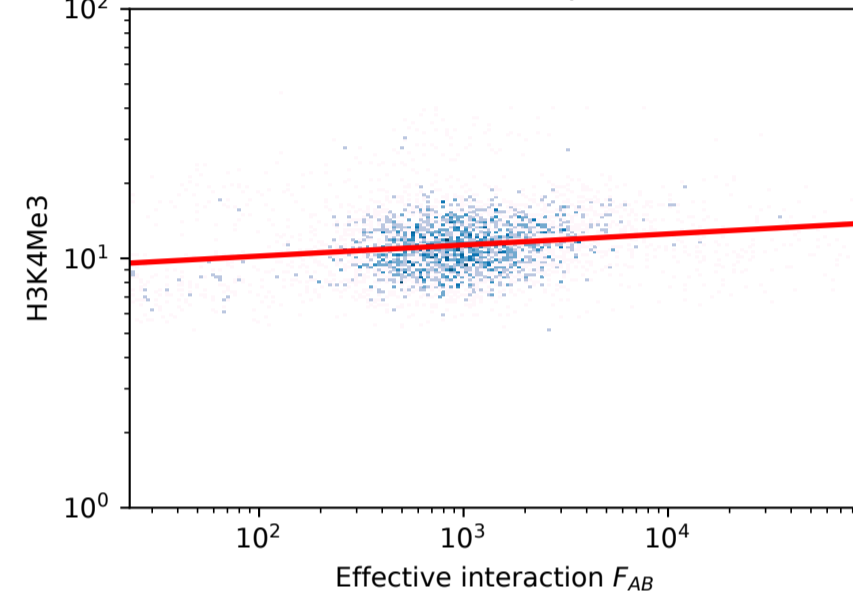CTCF ( $r=0.367$ ,  $p=2.0e-136$ )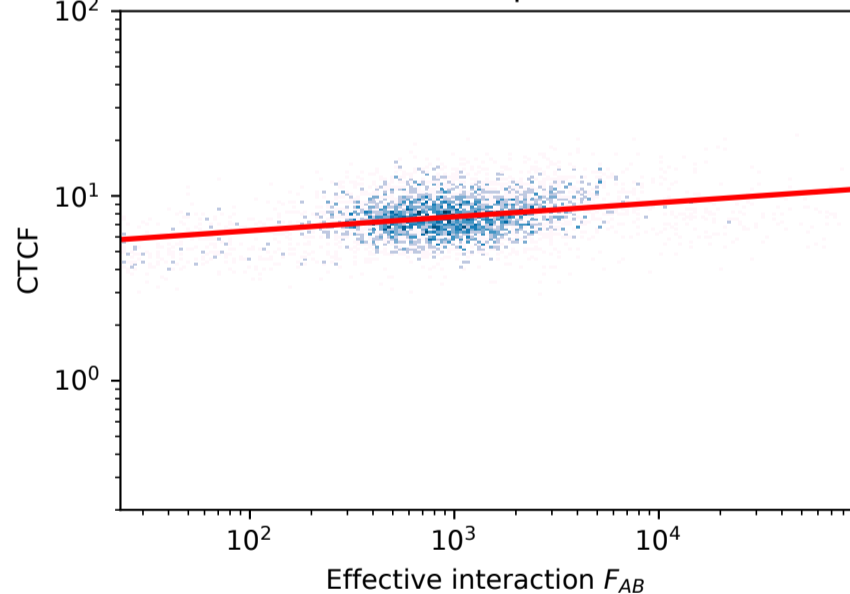RAD21 ( $r=0.294$ ,  $p=8.0e-86$ )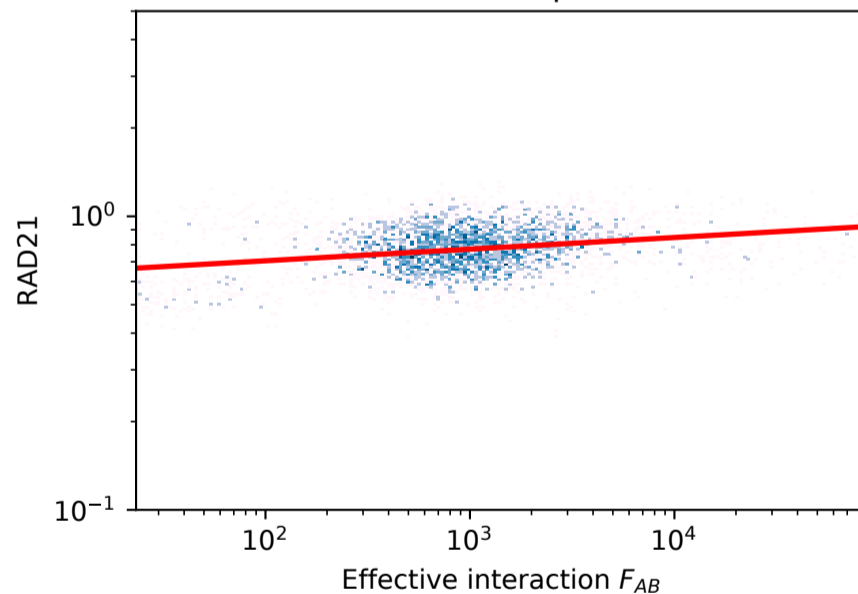POL2 ( $r=0.102$ ,  $p=1.8e-11$ )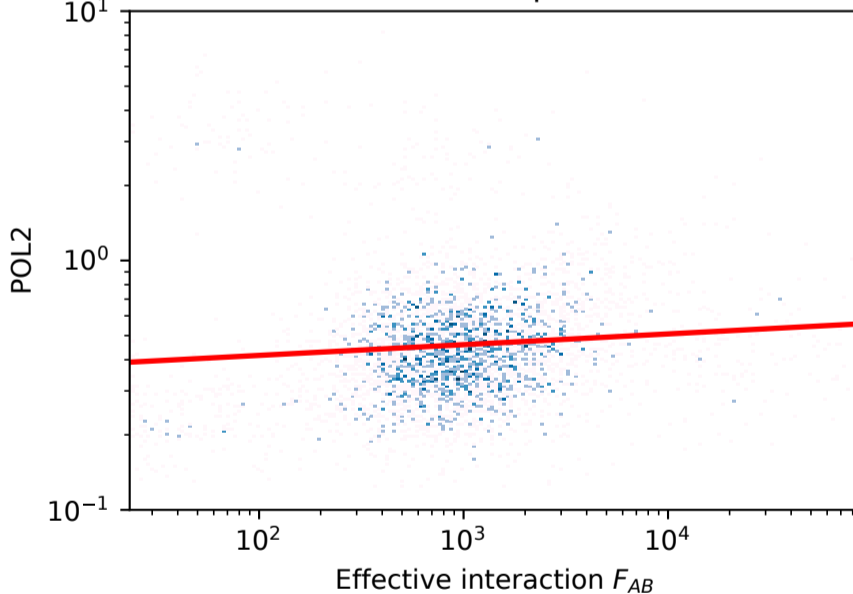POL3 ( $r=0.073$ ,  $p=1.8e-06$ )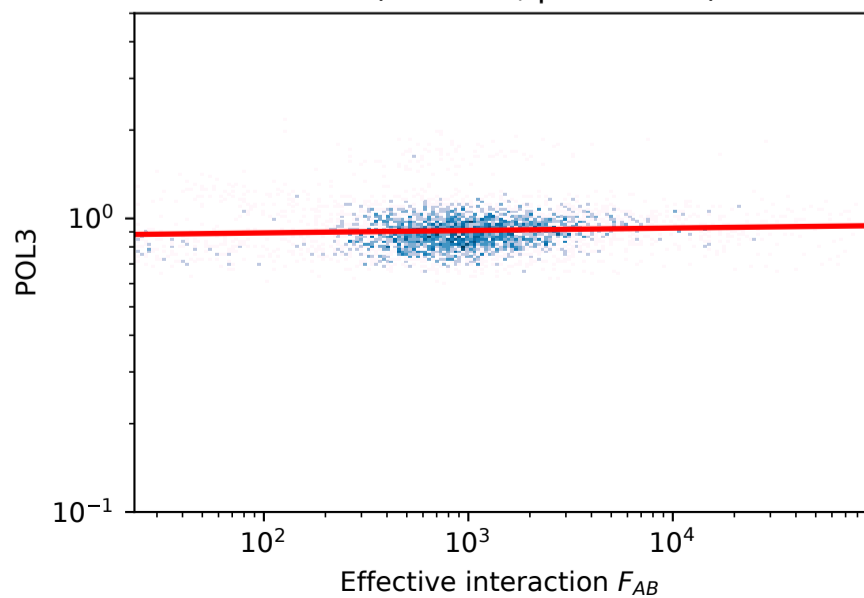DNA accessibility ( $r=0.364$ ,  $p=2.5e-134$ )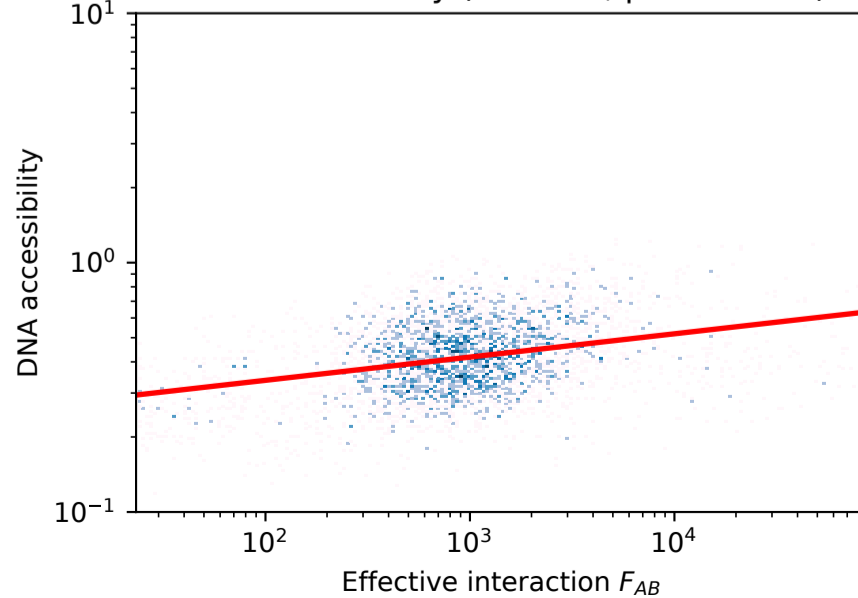

**C**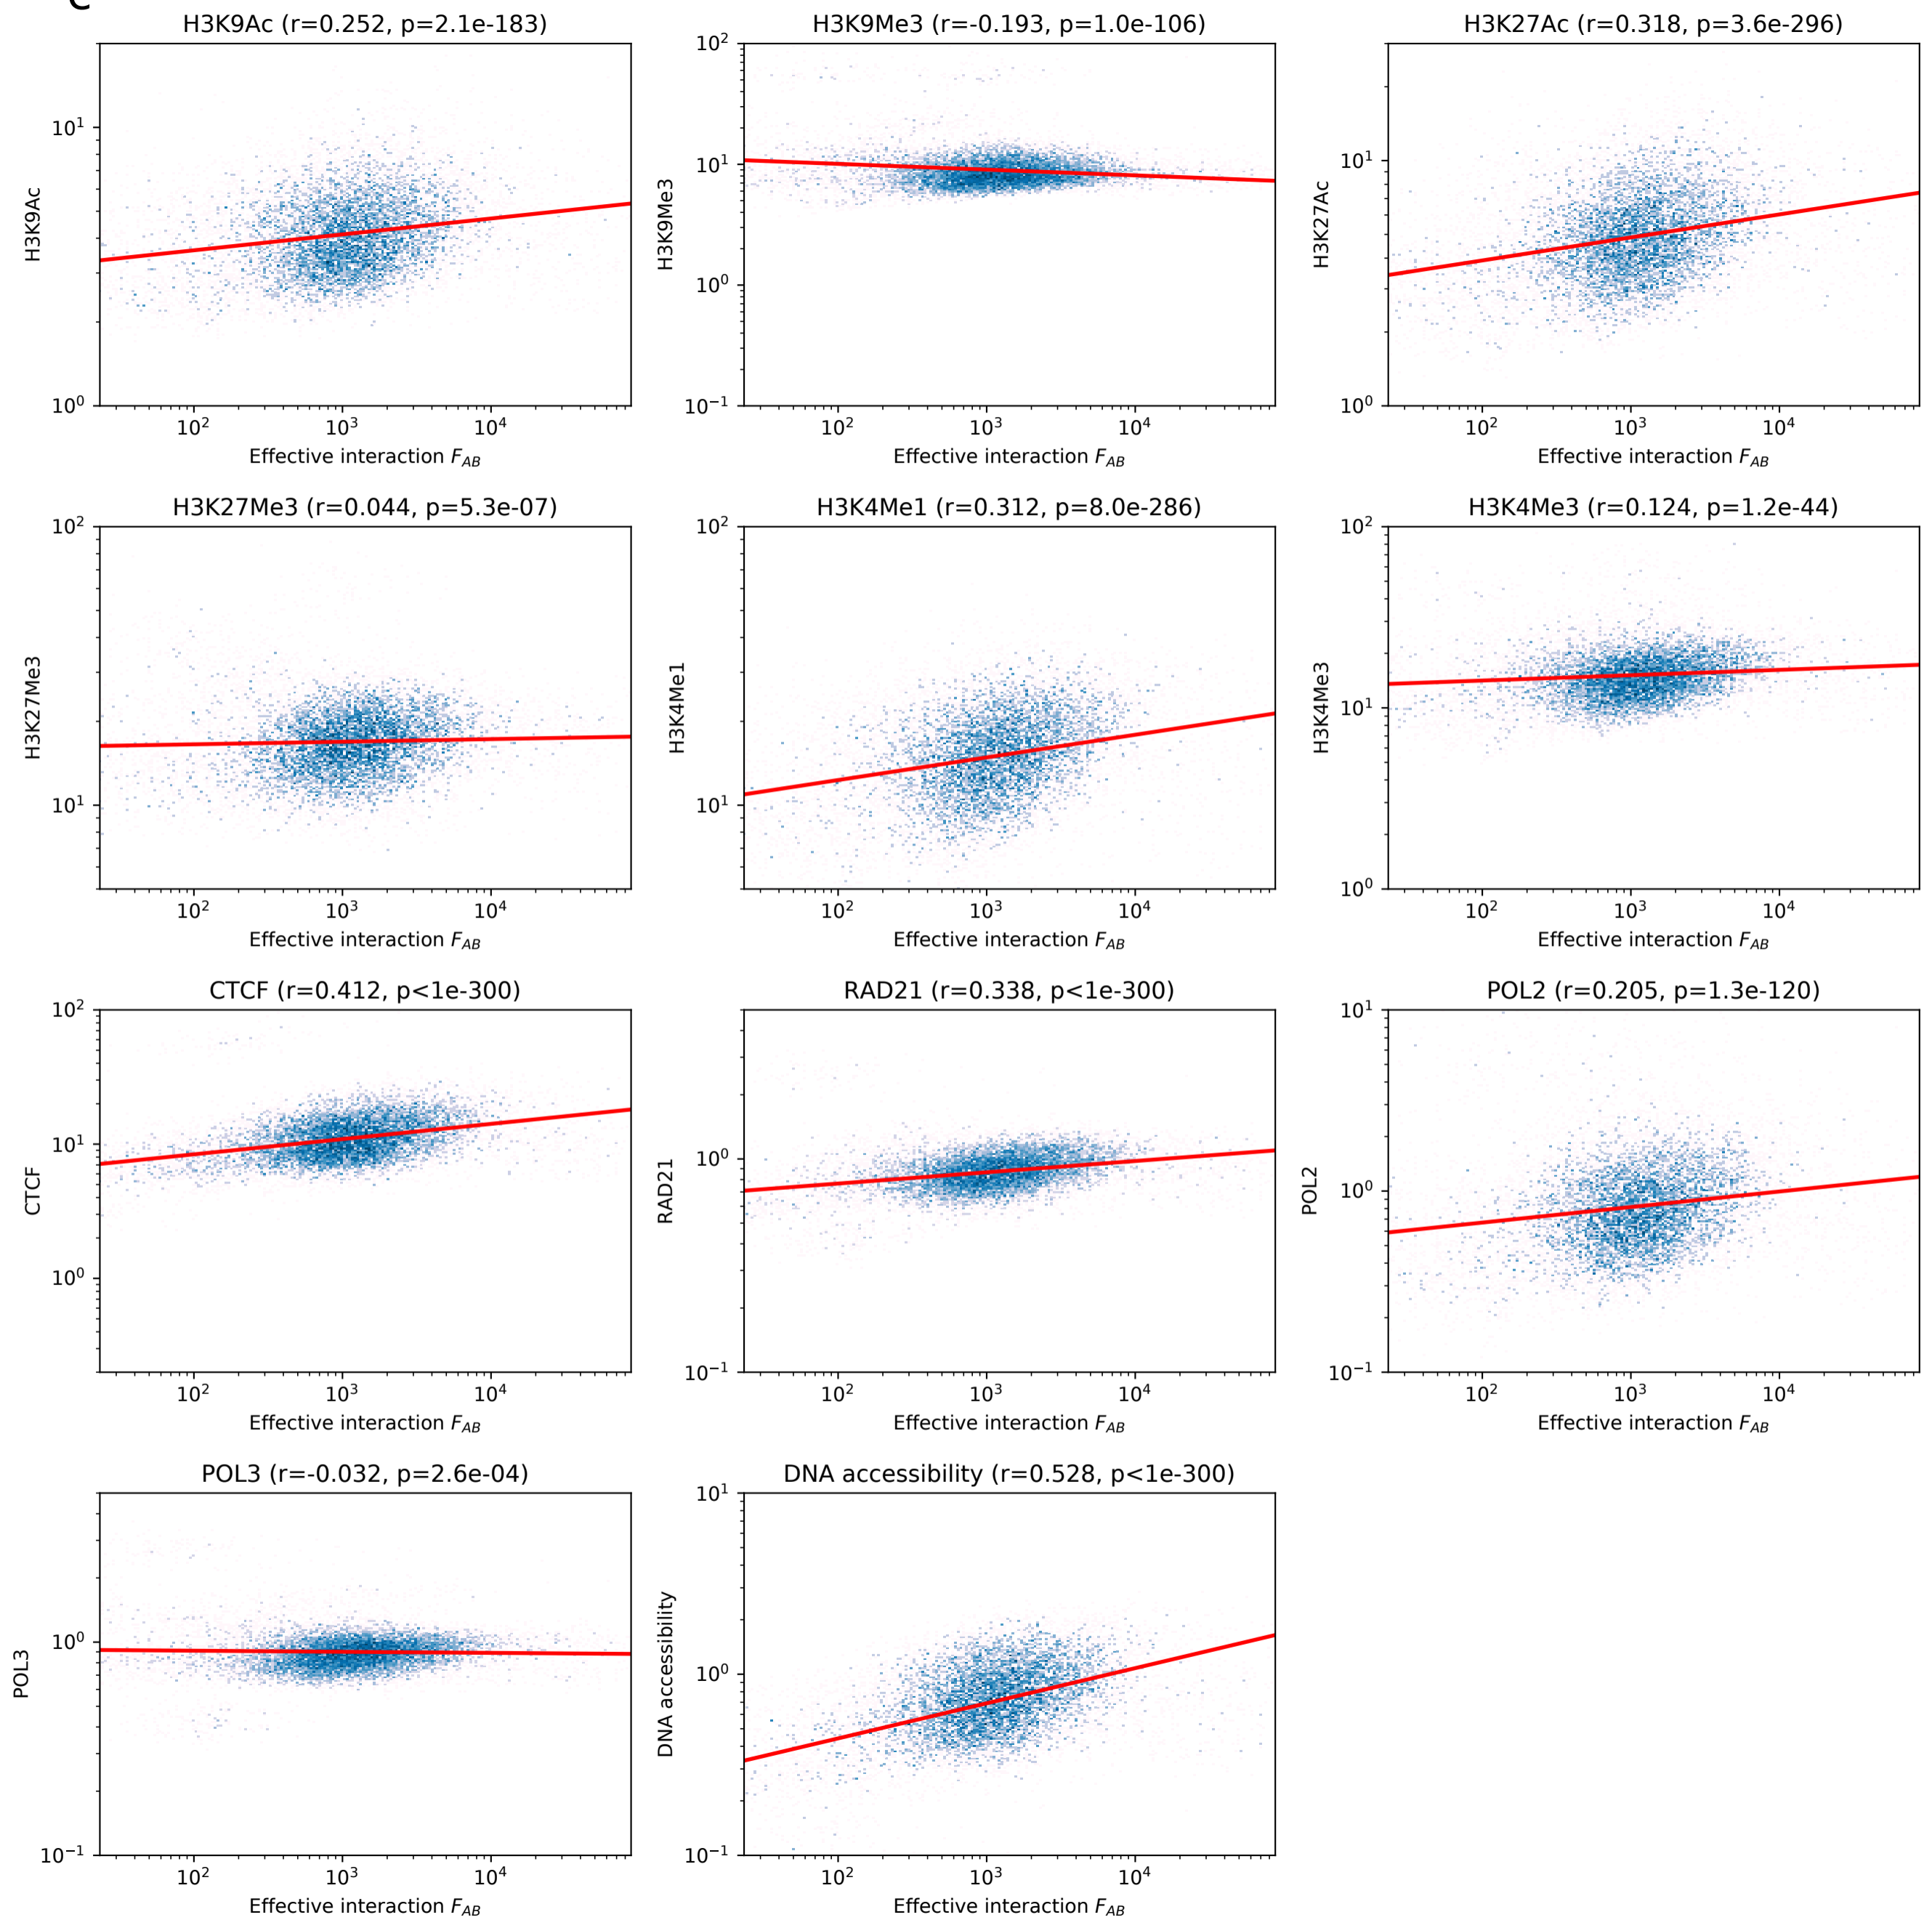

Supplement: pcbi.1006686.s012.pdf [file pcbi.1006686.s012.pdf]
