# Supplementary material for: Exploring chromatin hierarchical organization via Markov State Modelling
Source: PubMed Central journal article supplement (PMC6355033; doi:10.1371/journal.pcbi.1006686), 2018-12-31
Supplement: pcbi.1006686.s001.pdf [file pcbi.1006686.s001.pdf]

Chromosome 7

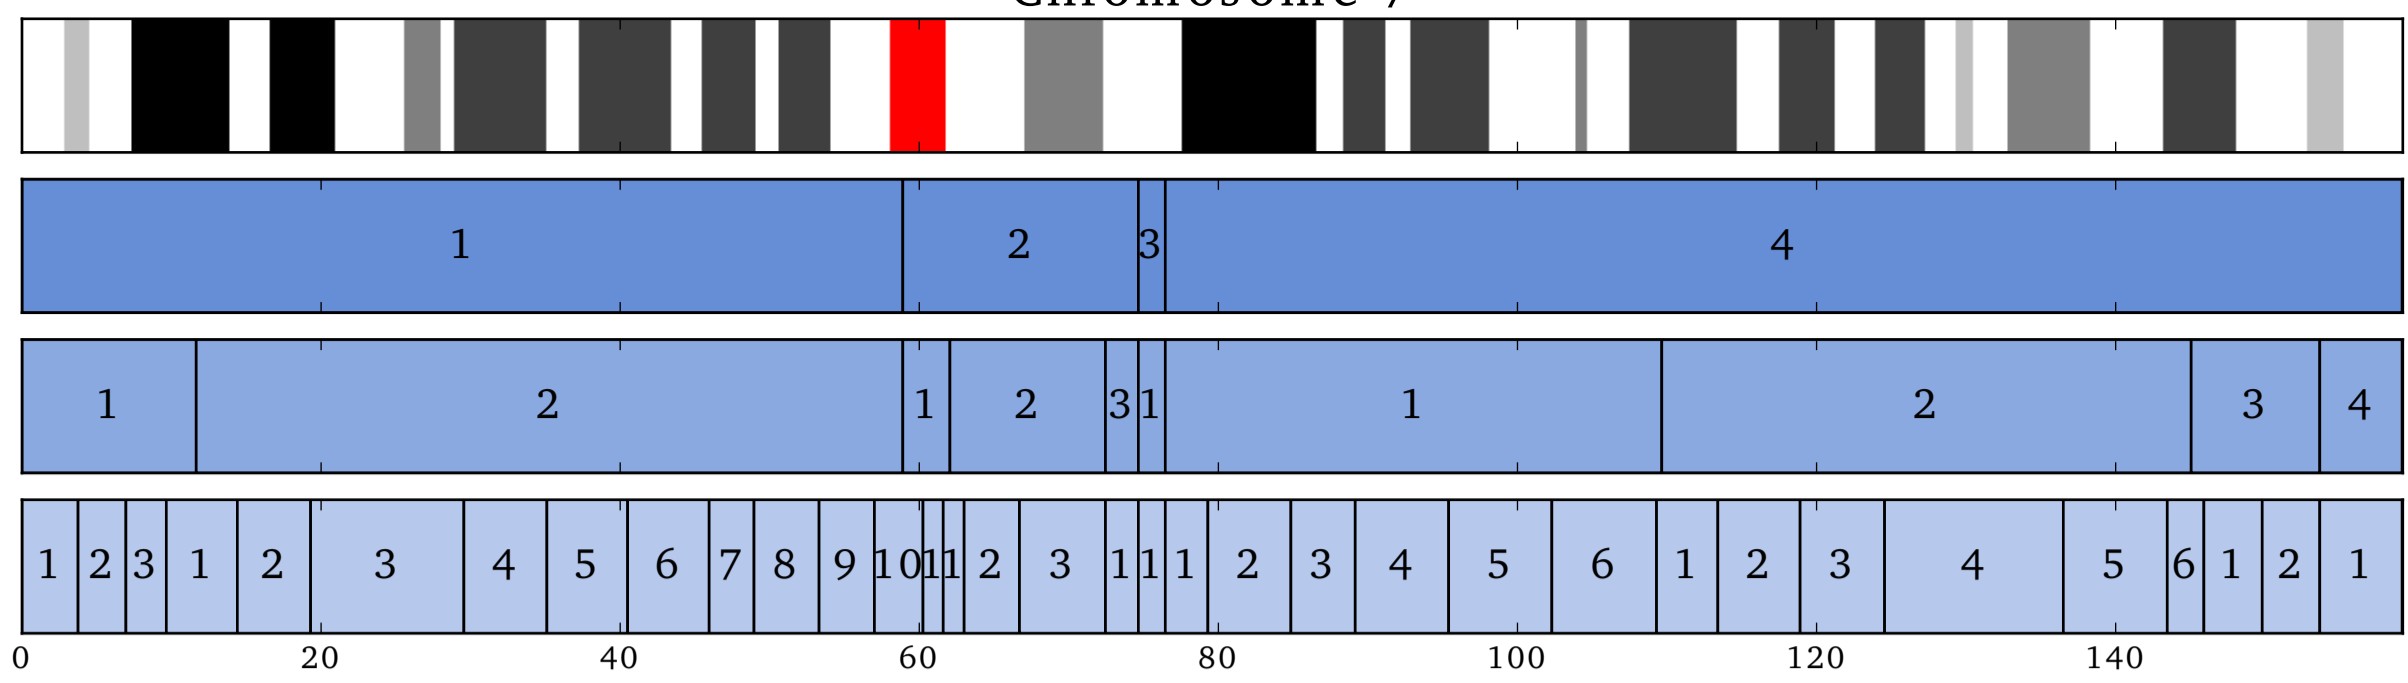

Chromosome 8

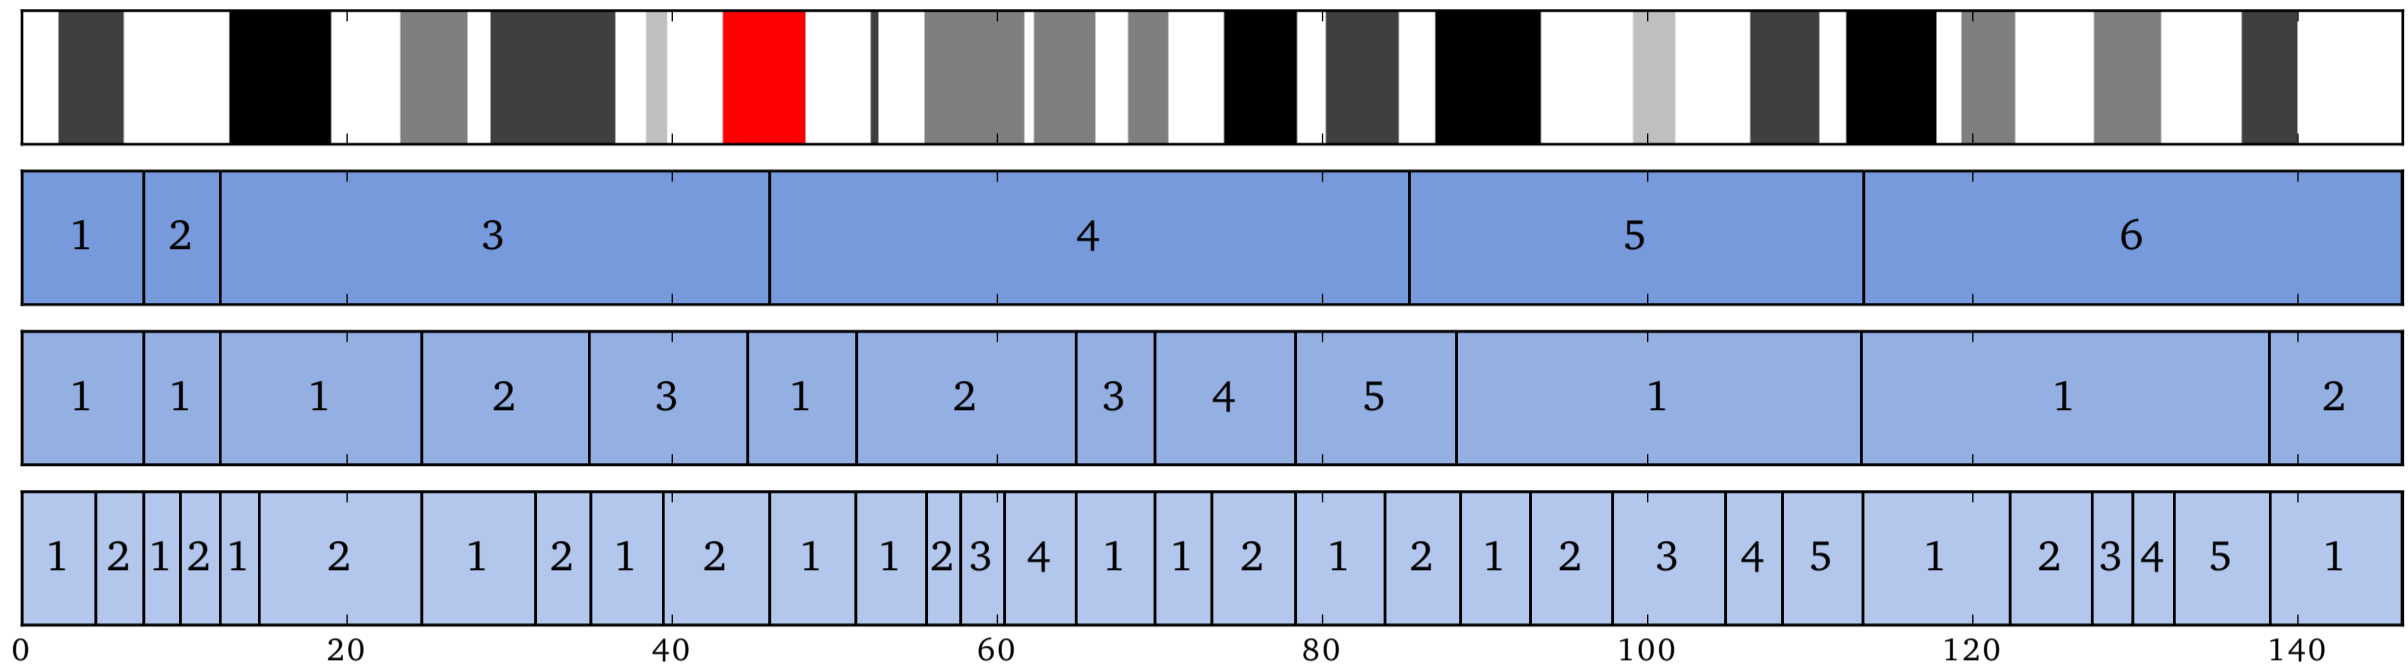

Chromosome 9

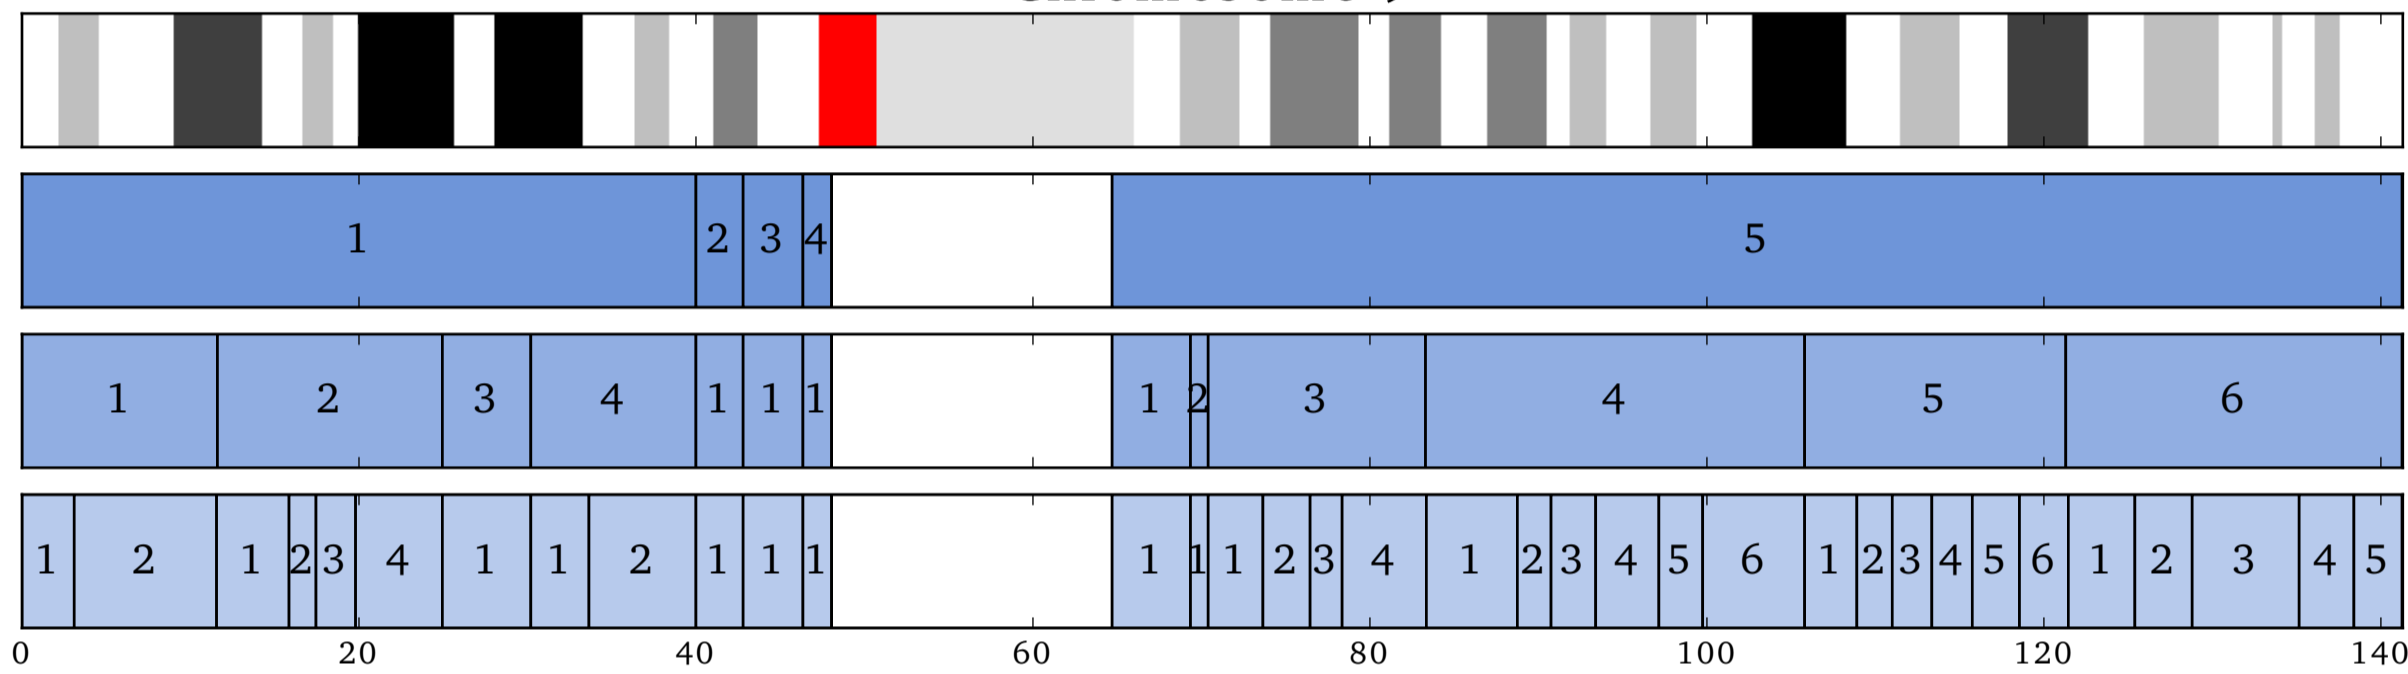

Chromosome 10

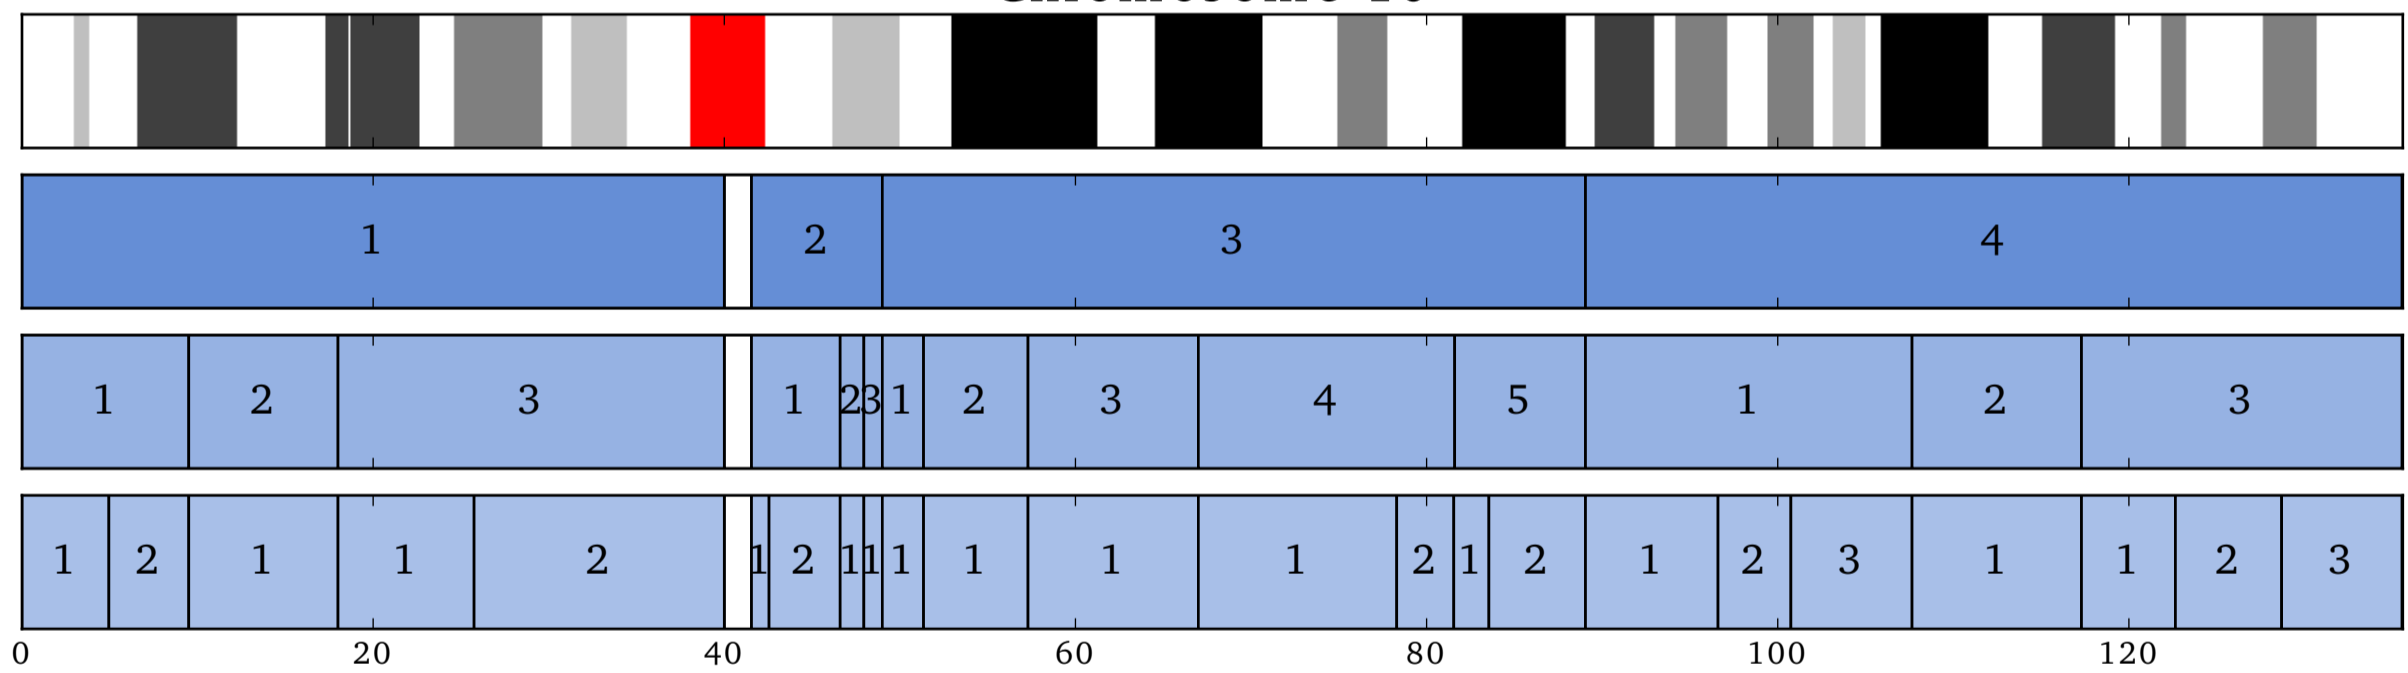

Chromosome 11

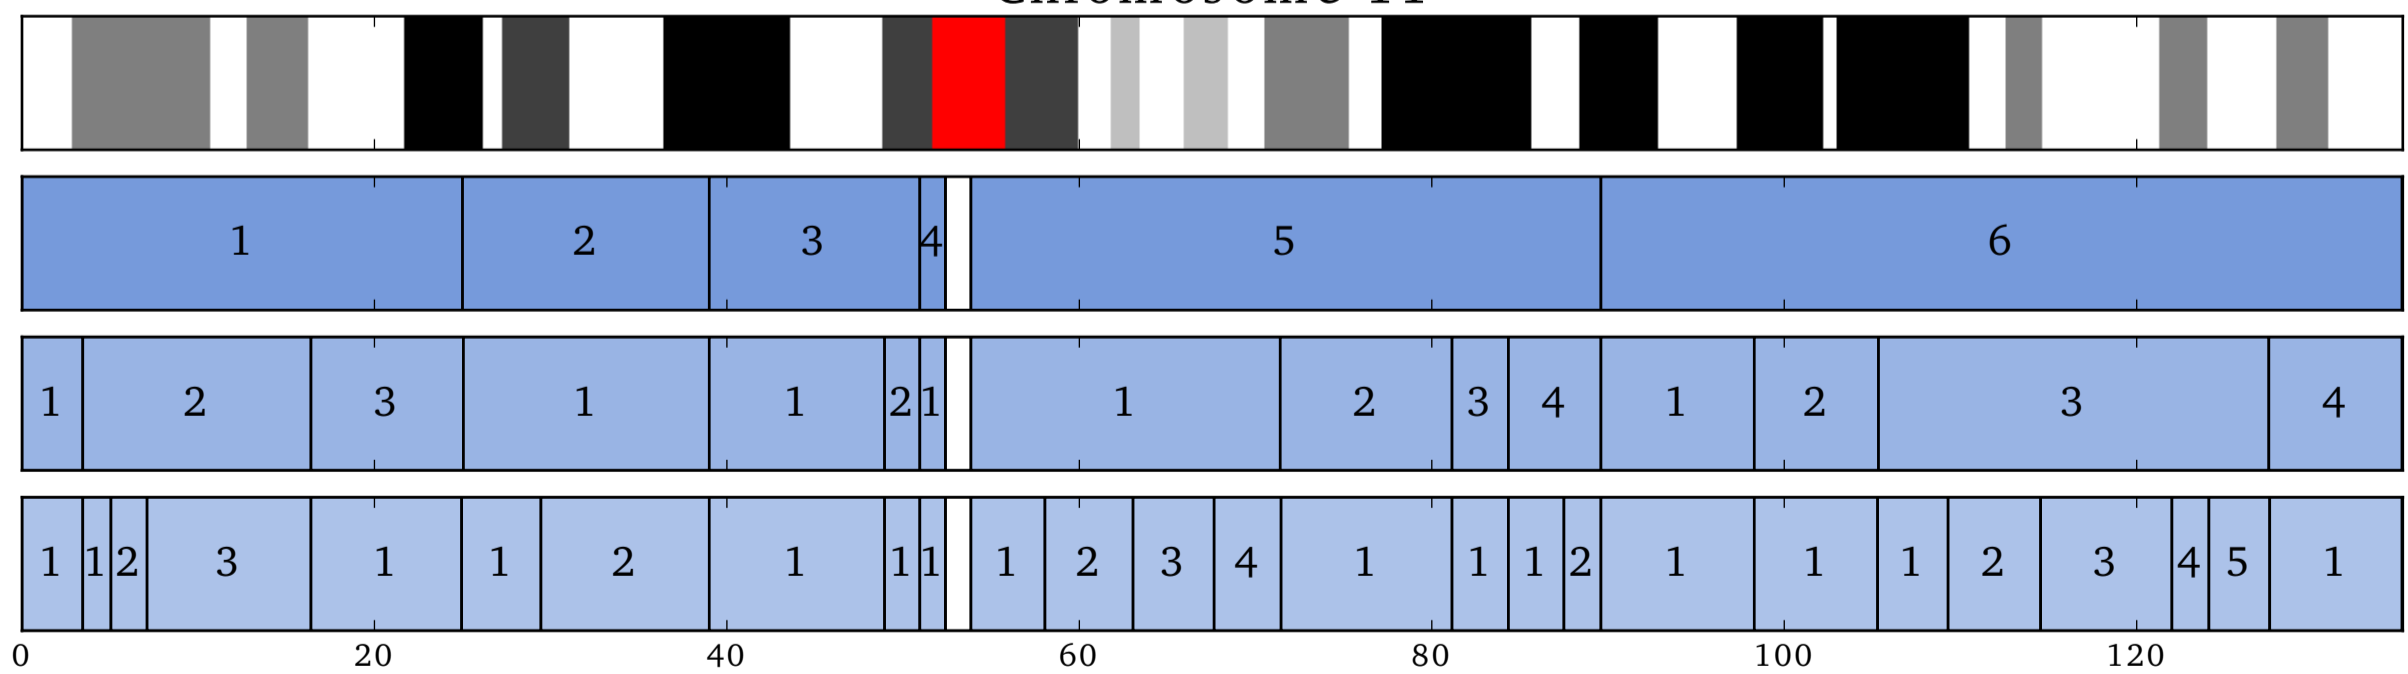

Chromosome 12

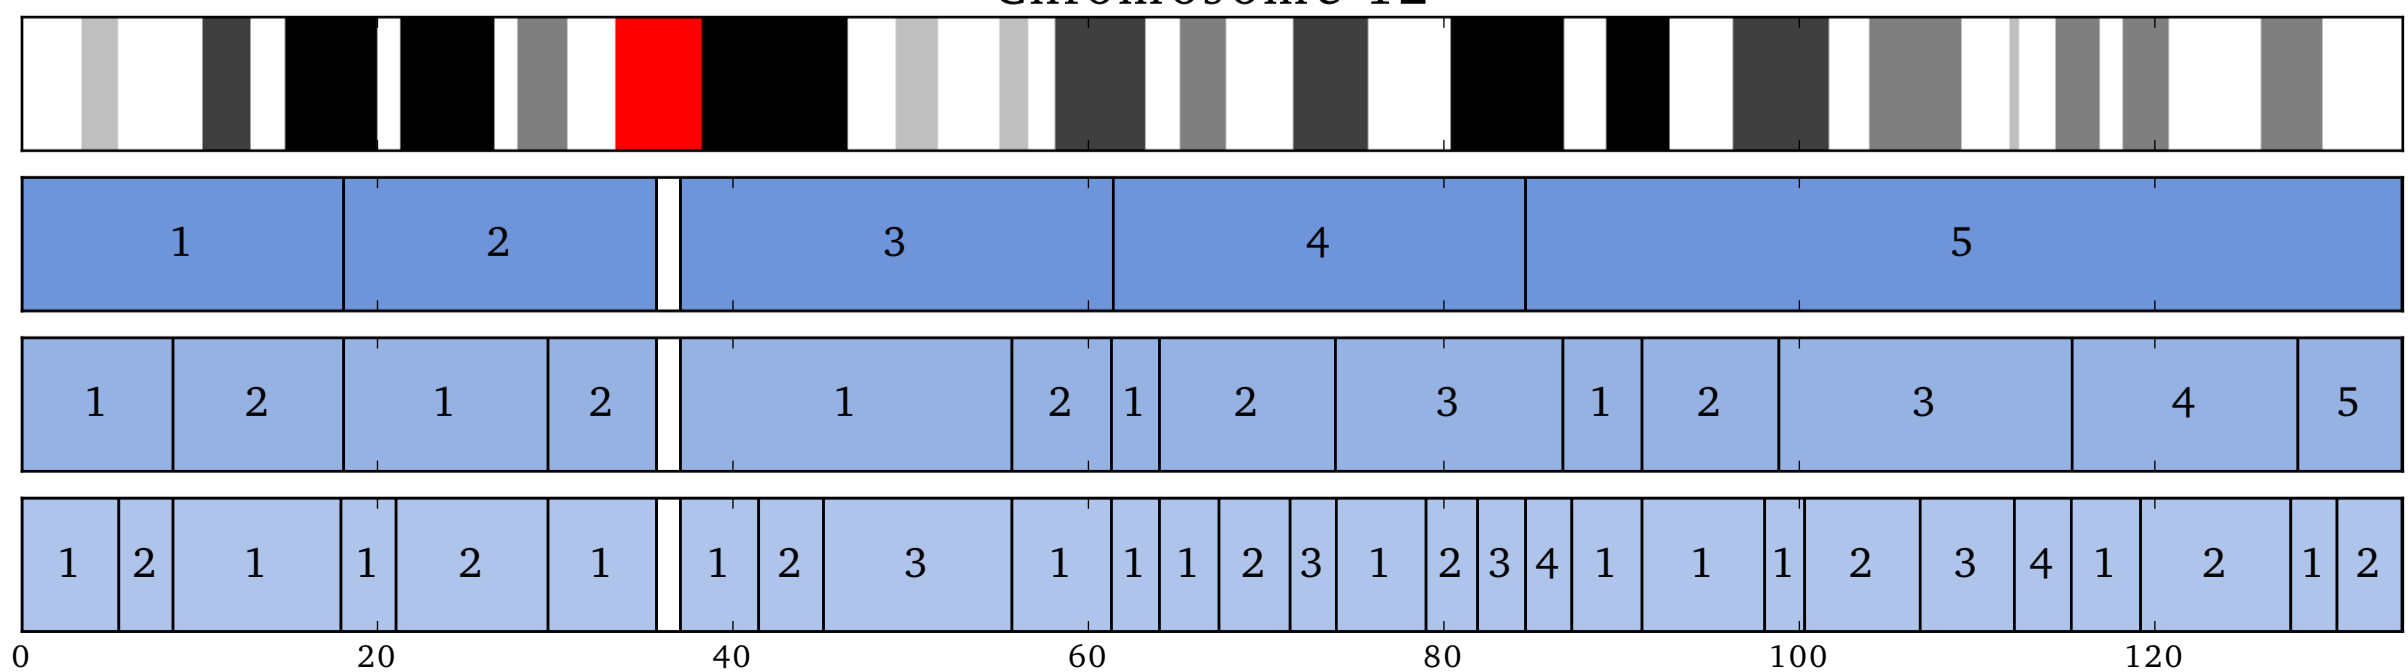

locus [Mbp]

Chromosome 13

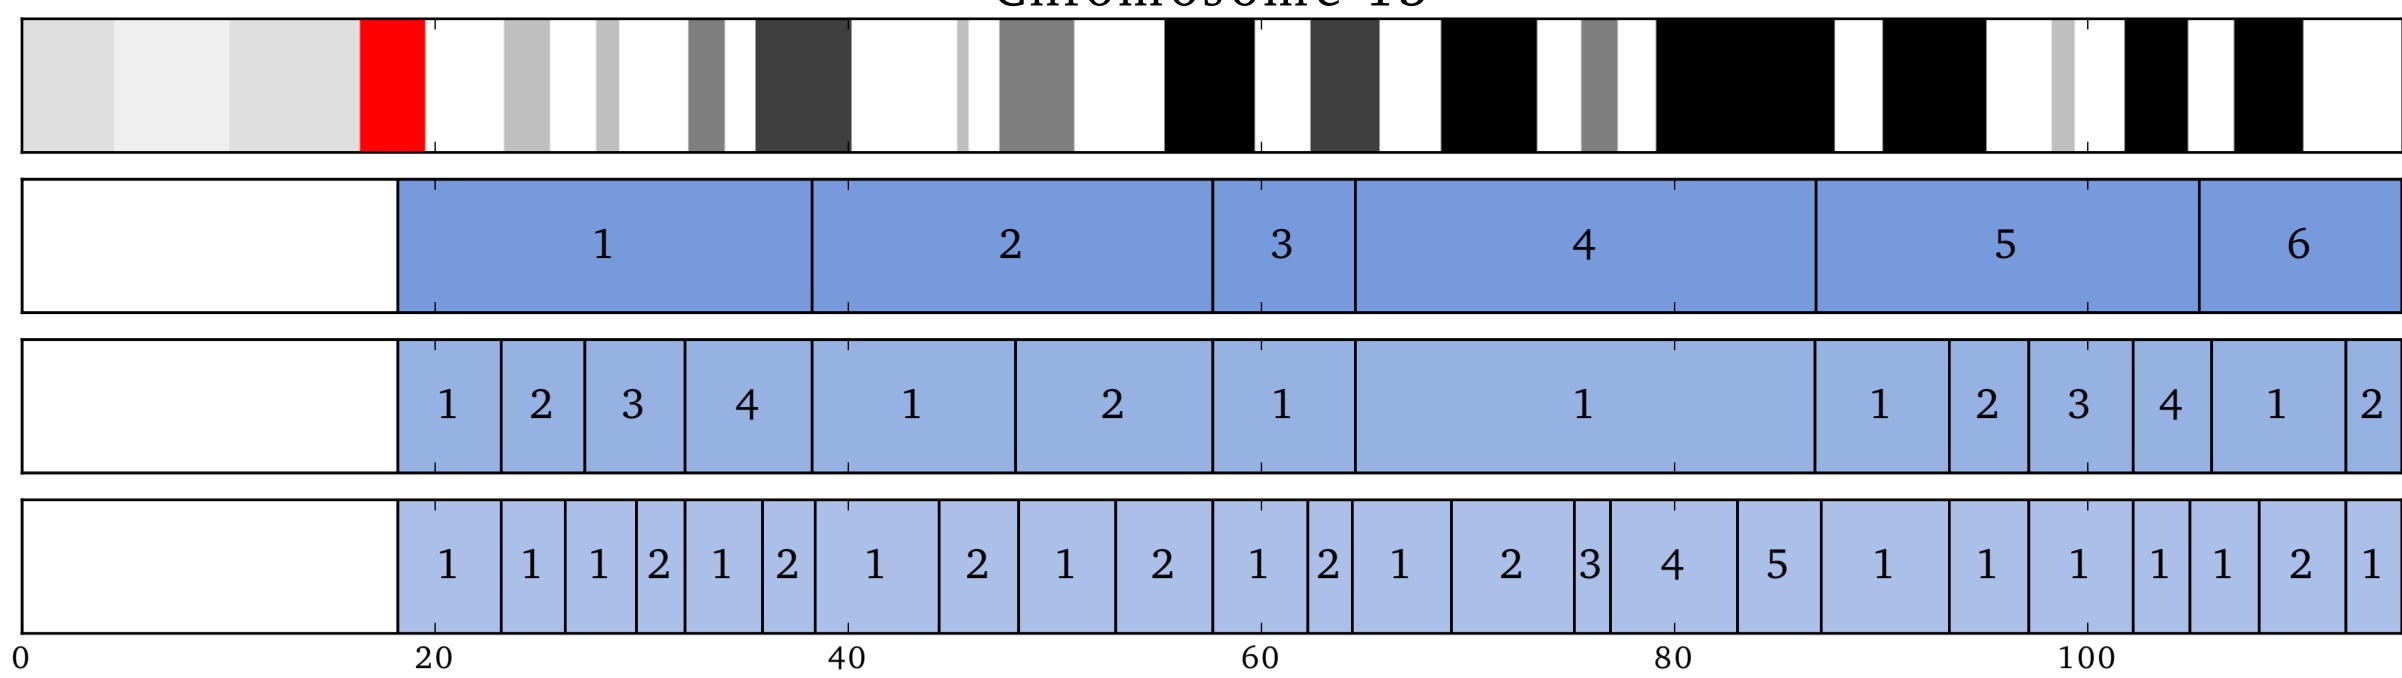

Chromosome 14

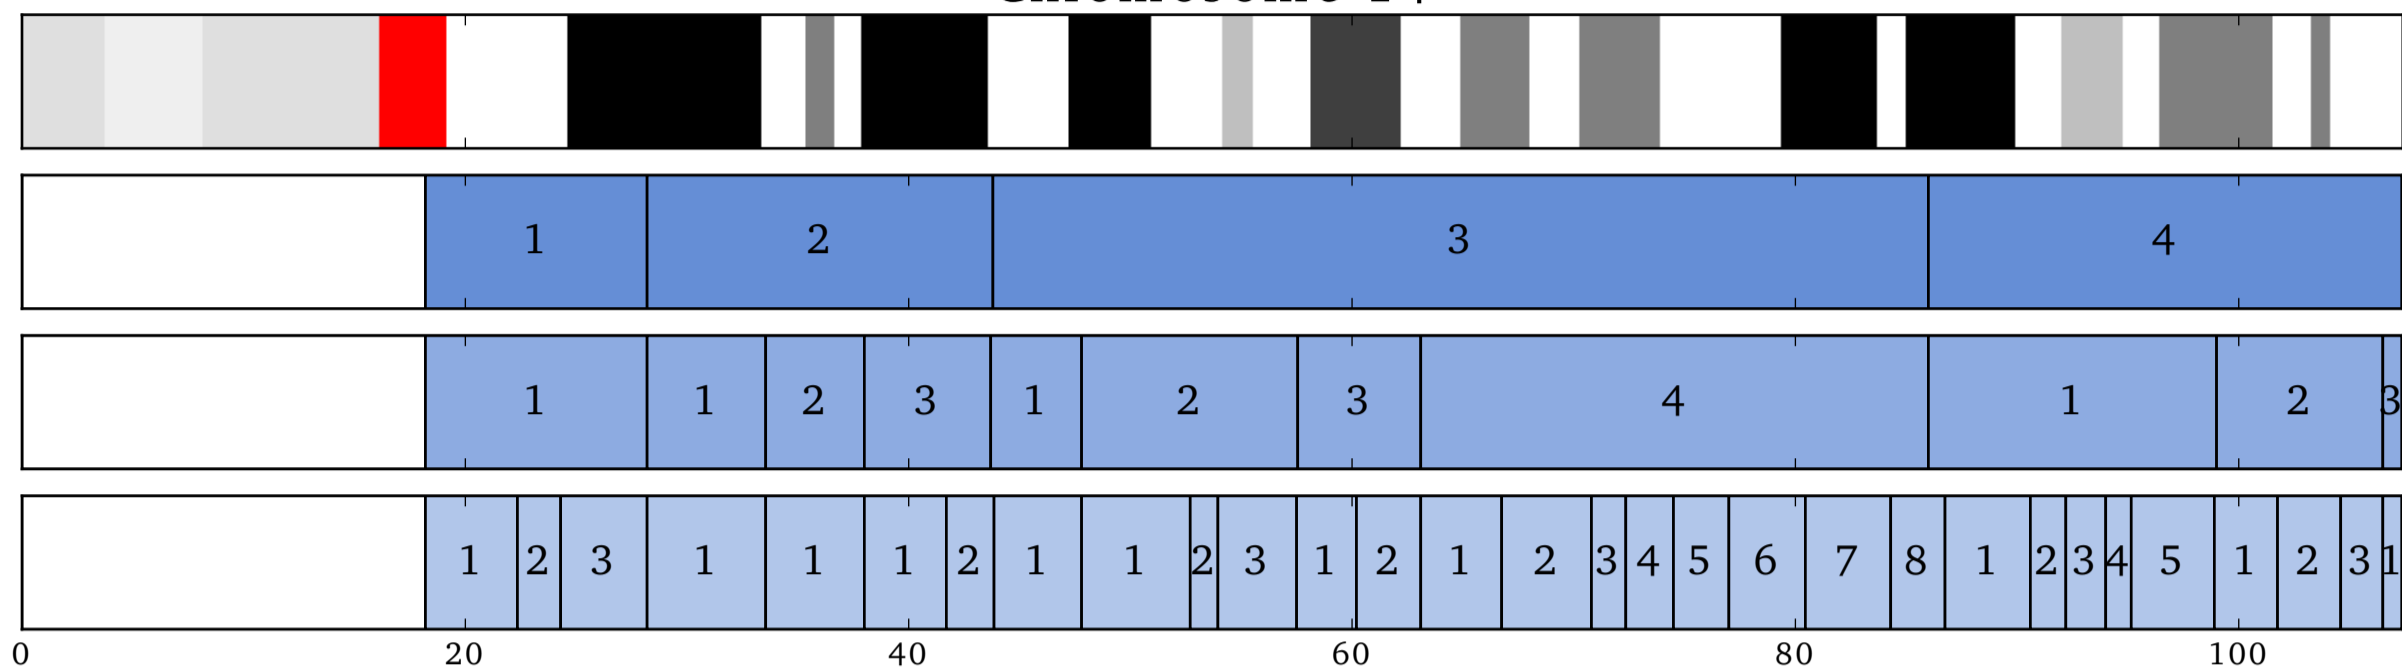

Chromosome 15

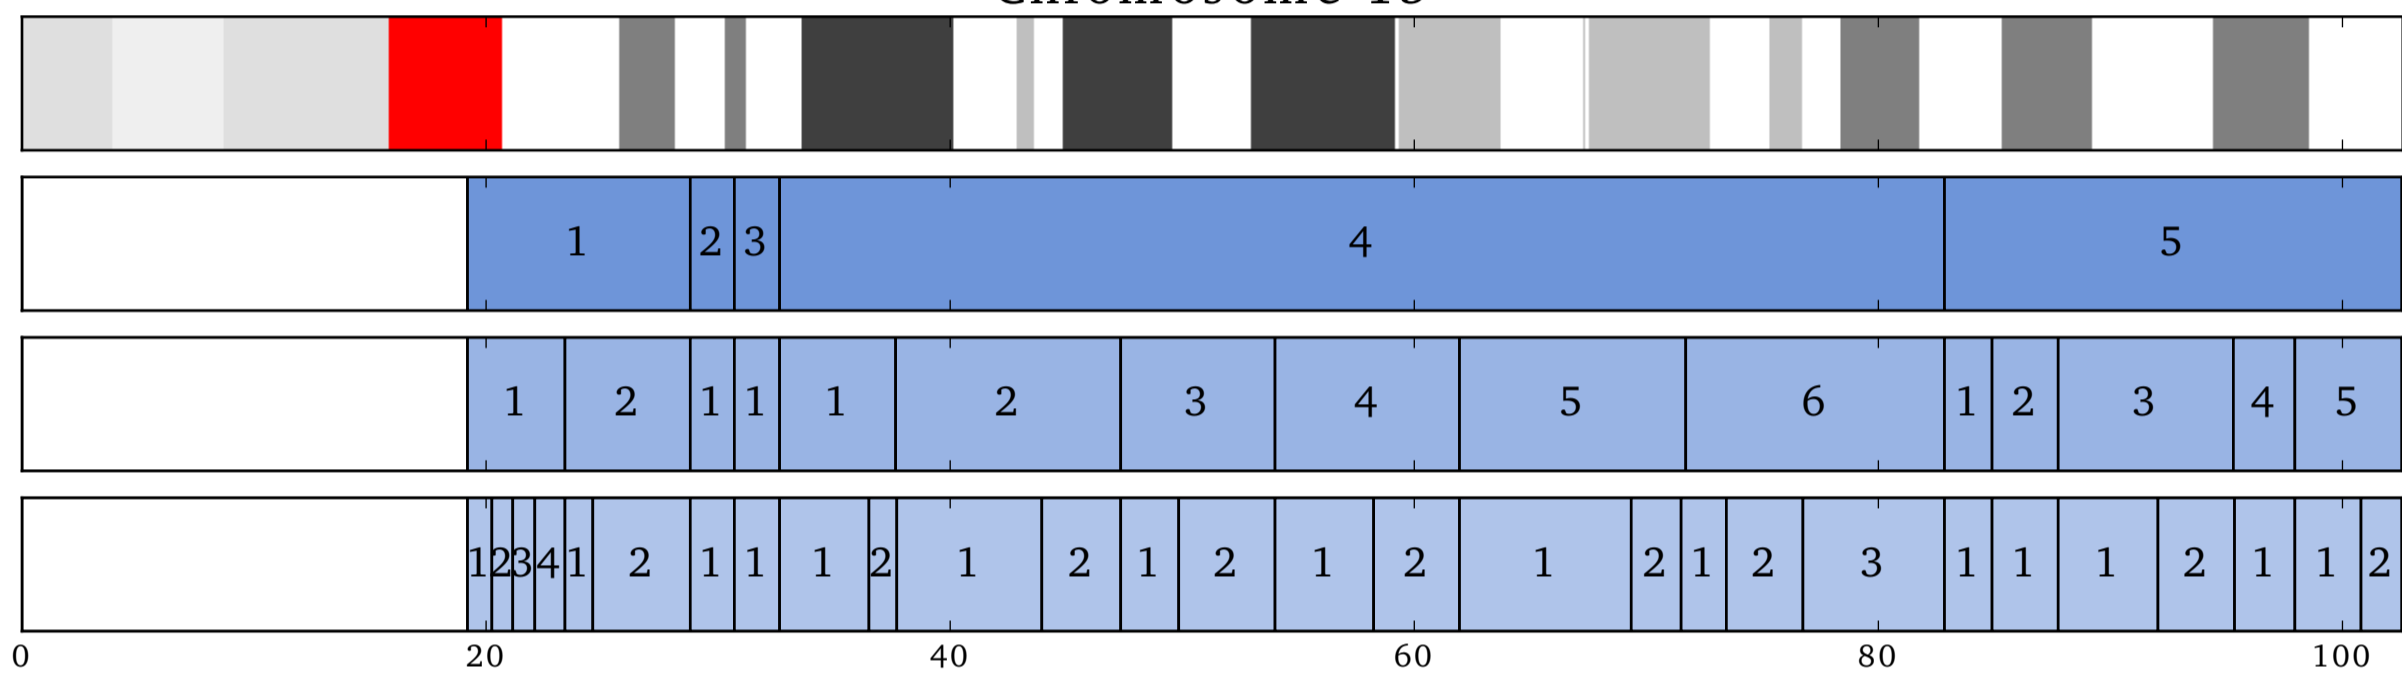

Chromosome 16

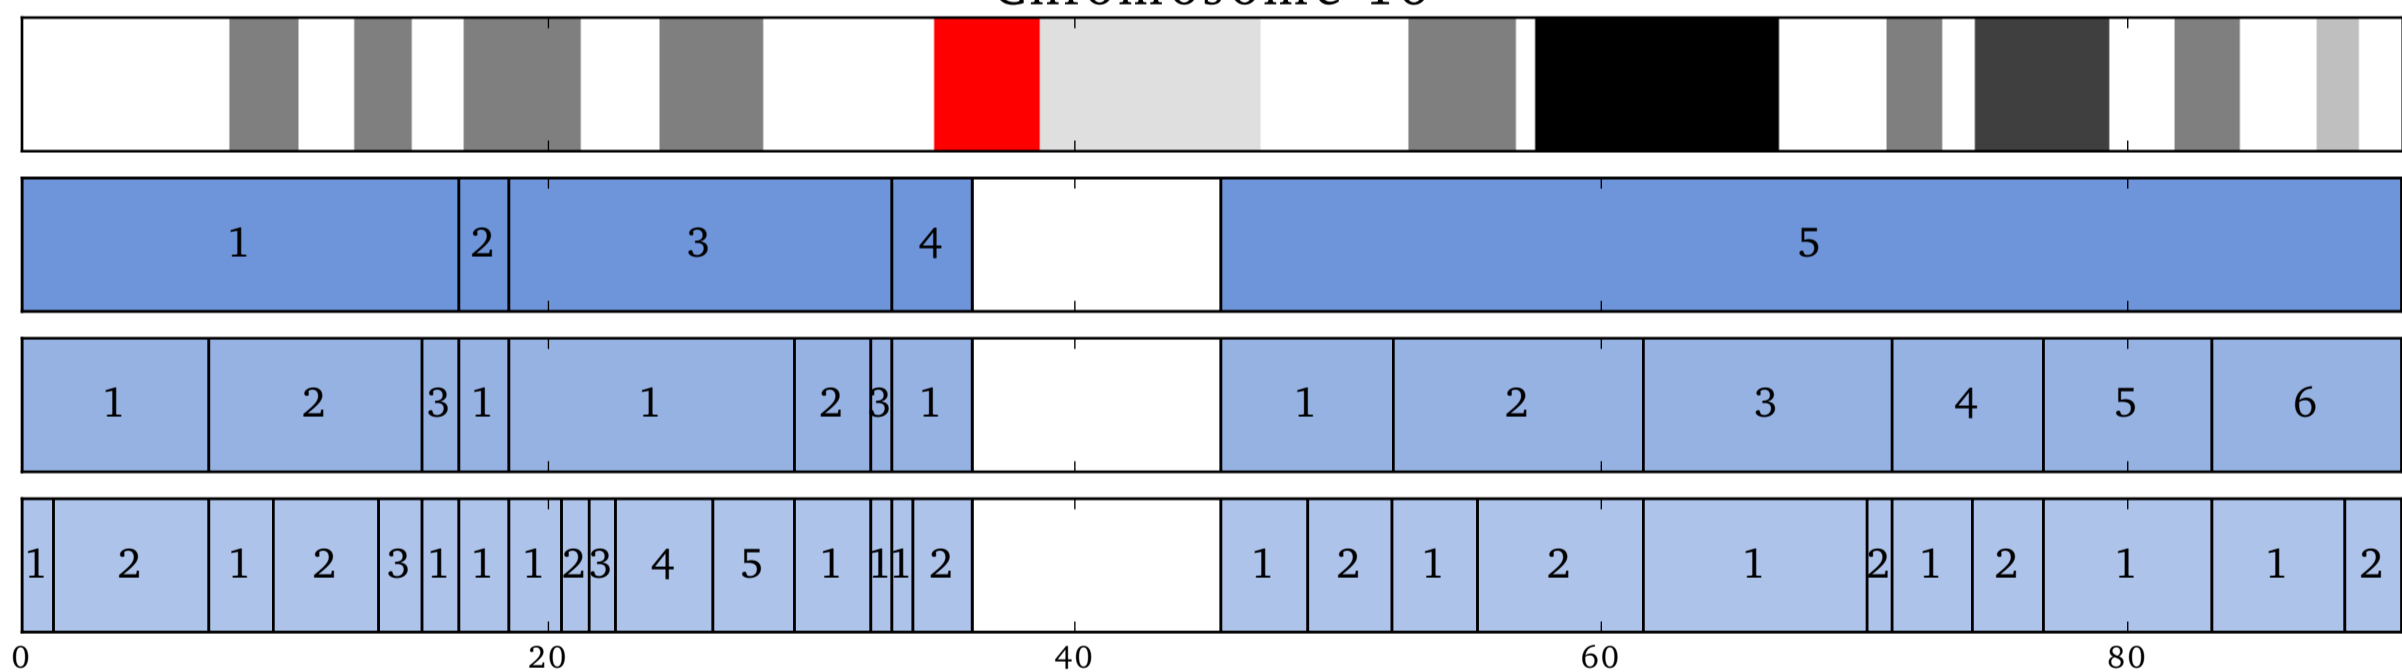

Chromosome 17

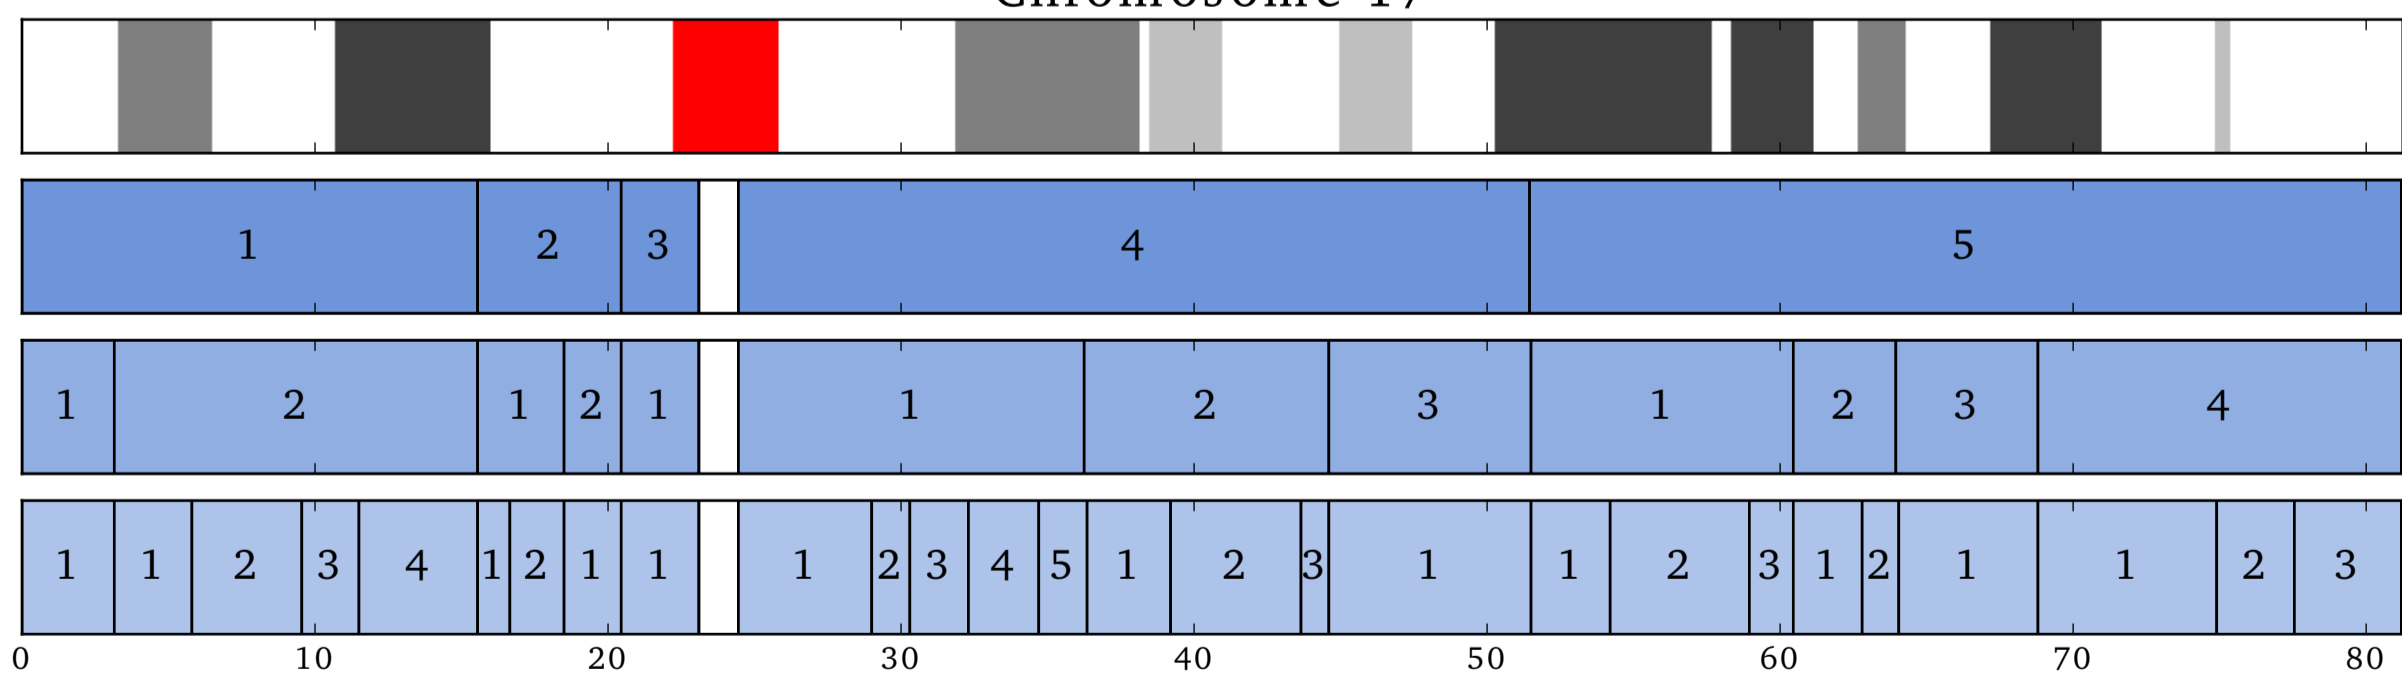

Chromosome 18

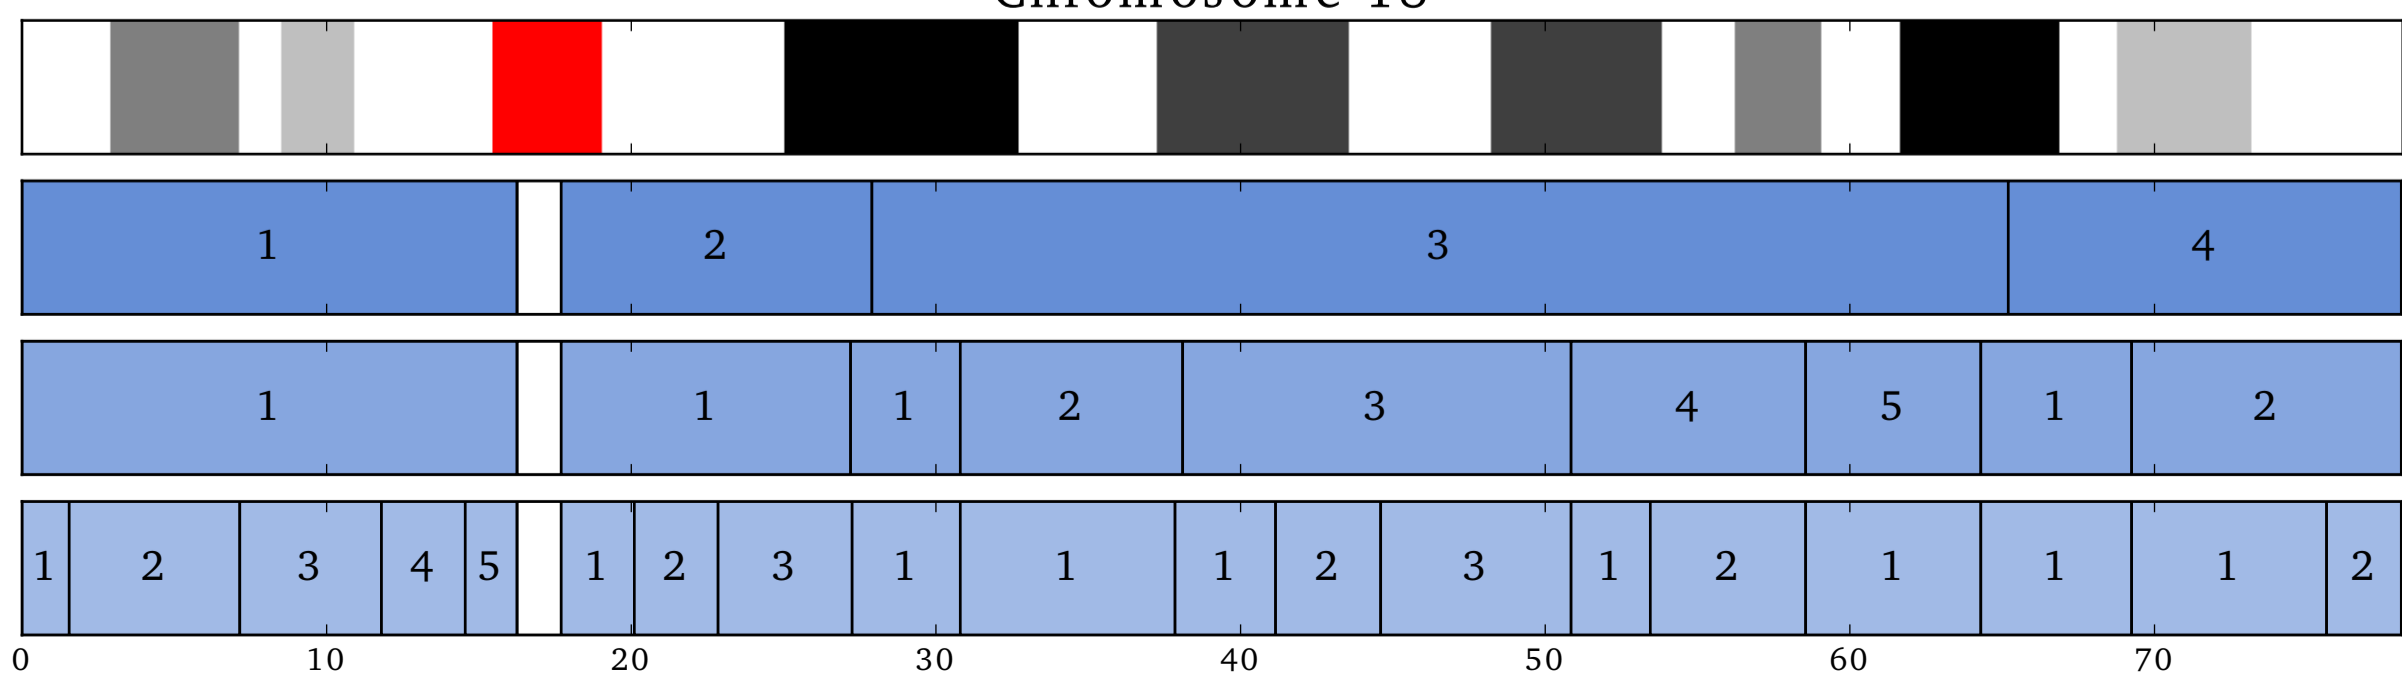

locus [Mbp]

Chromosome 19

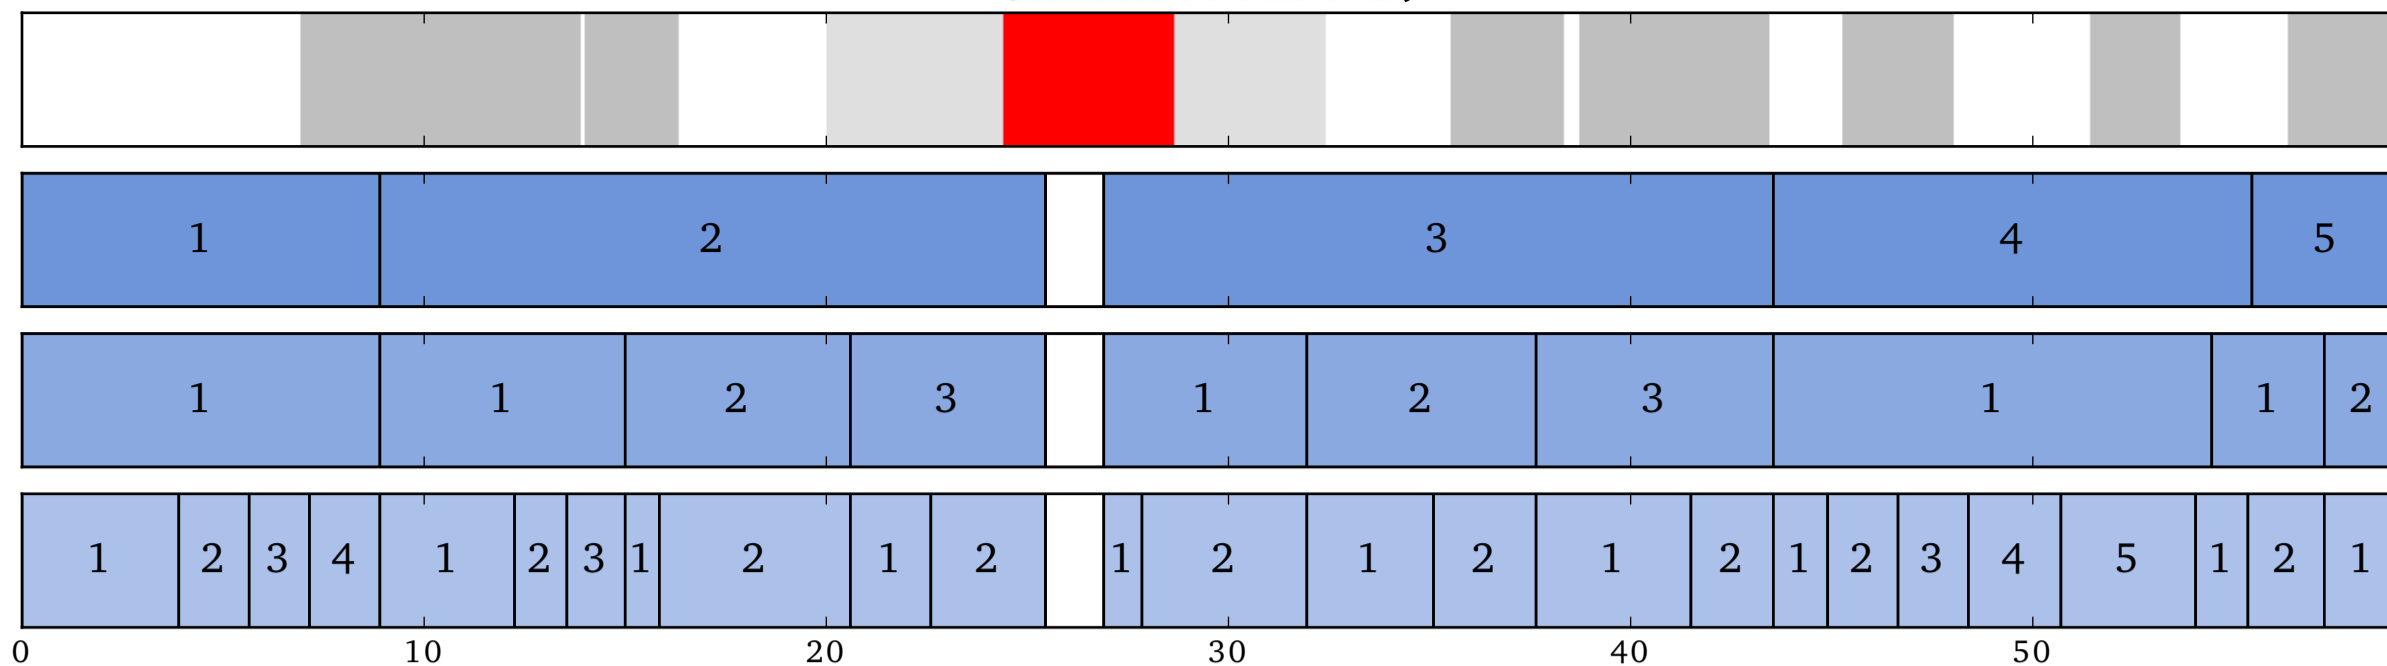

Chromosome 20

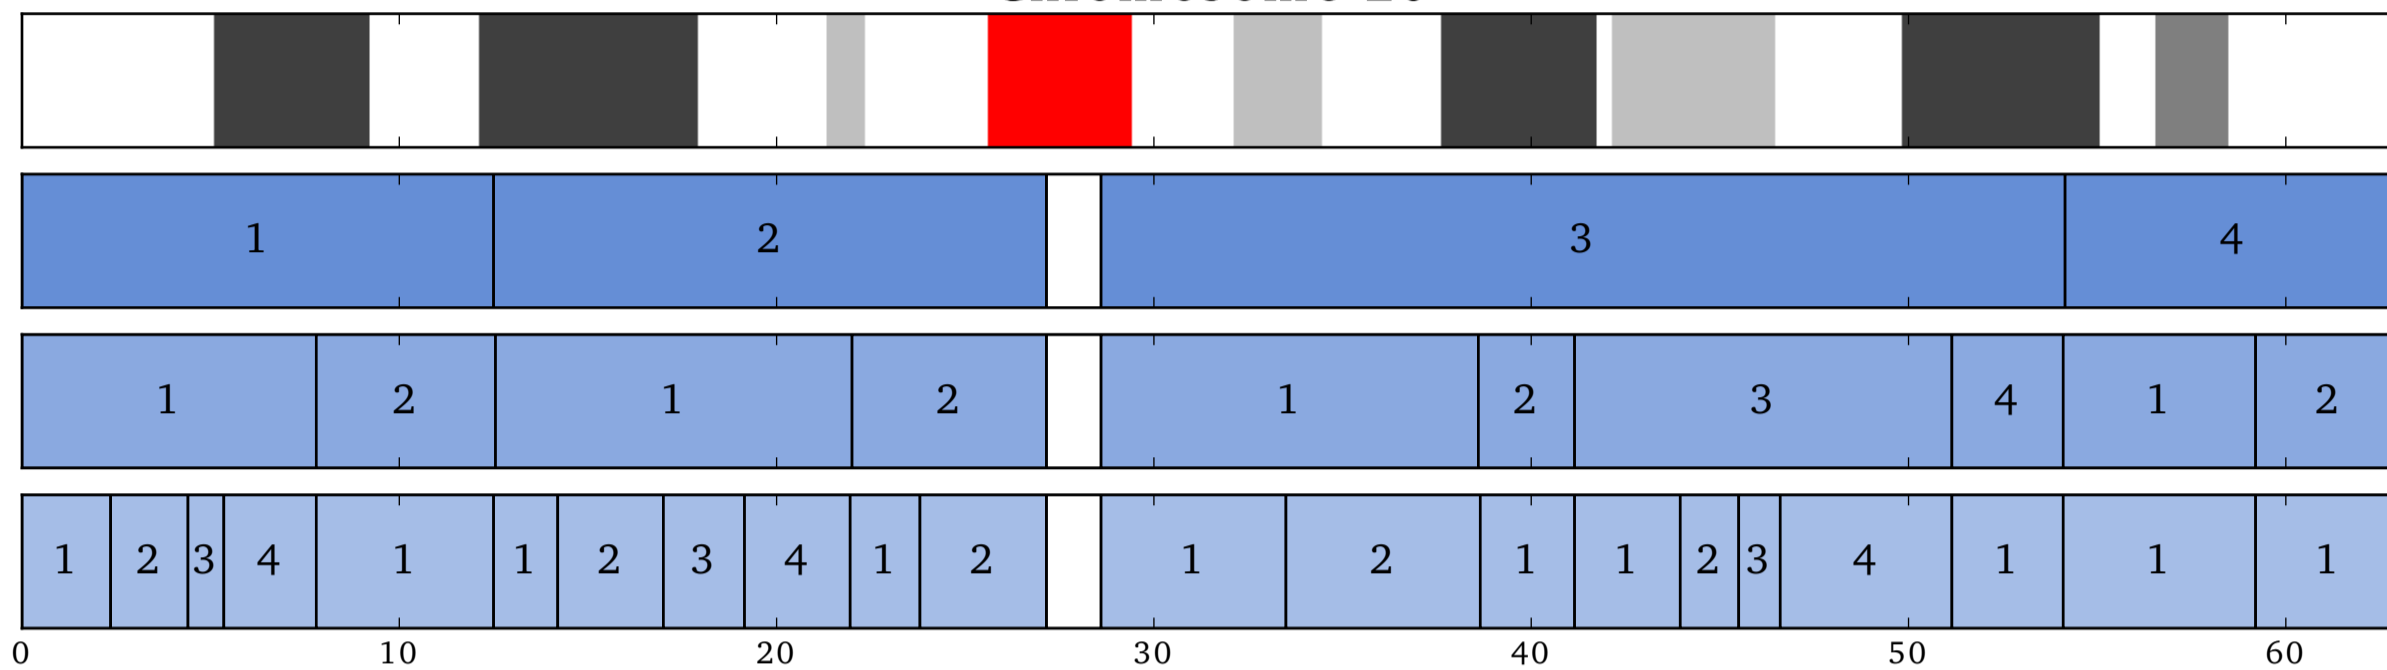

Chromosome 21

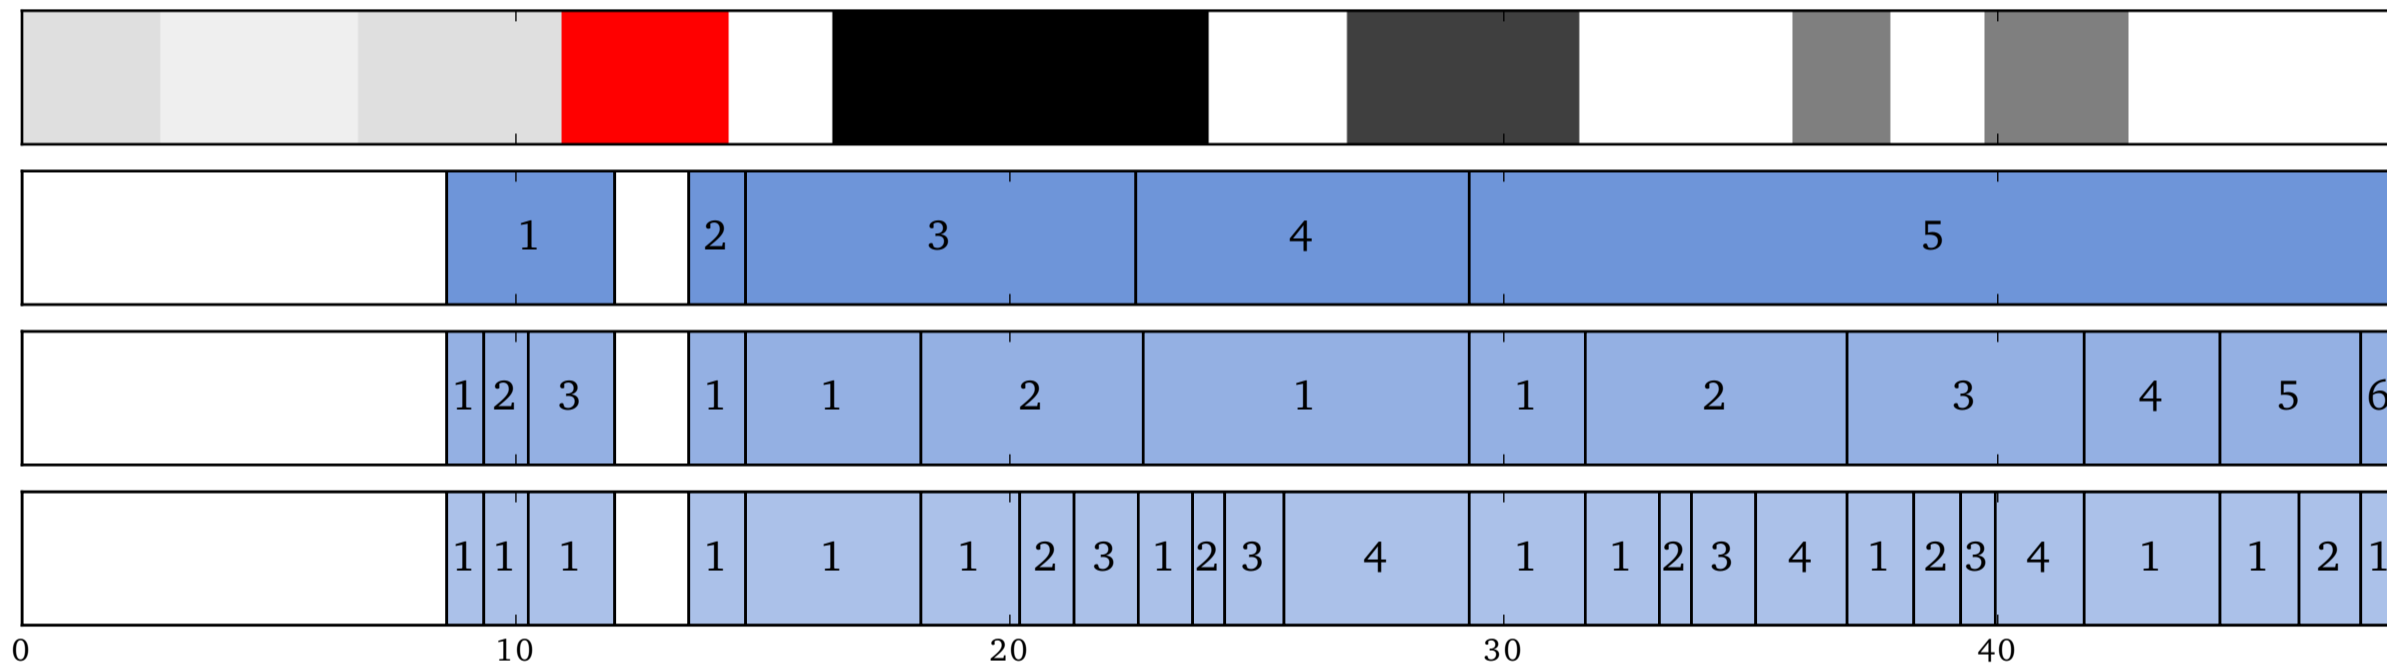

Chromosome 22

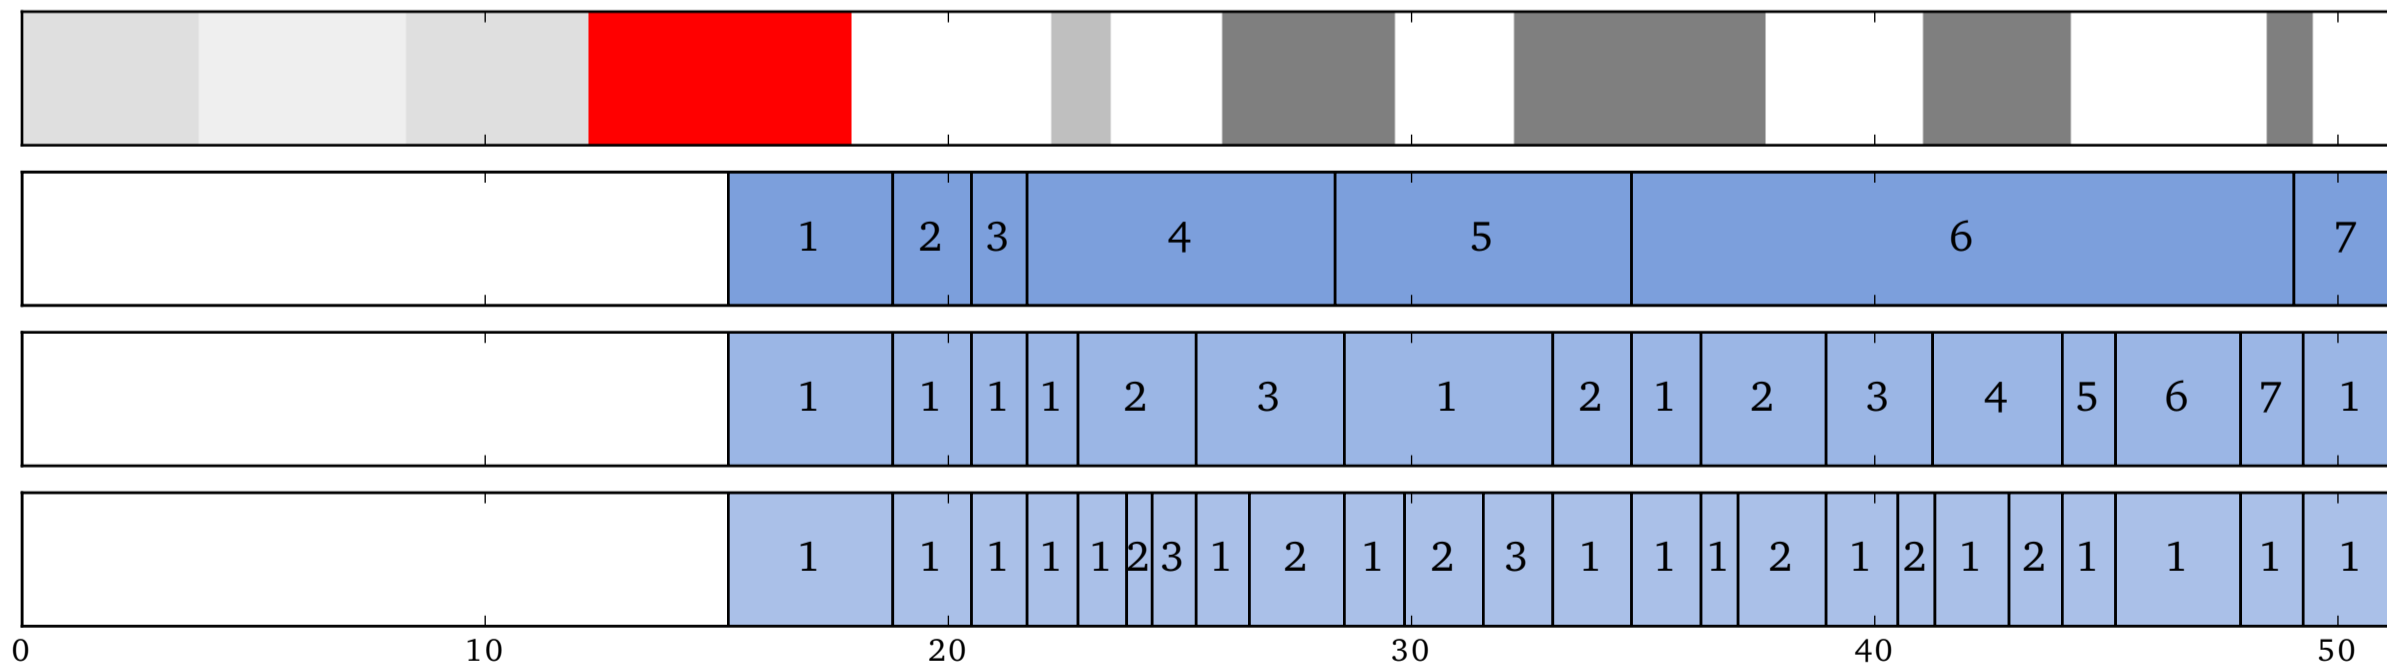

Chromosome X

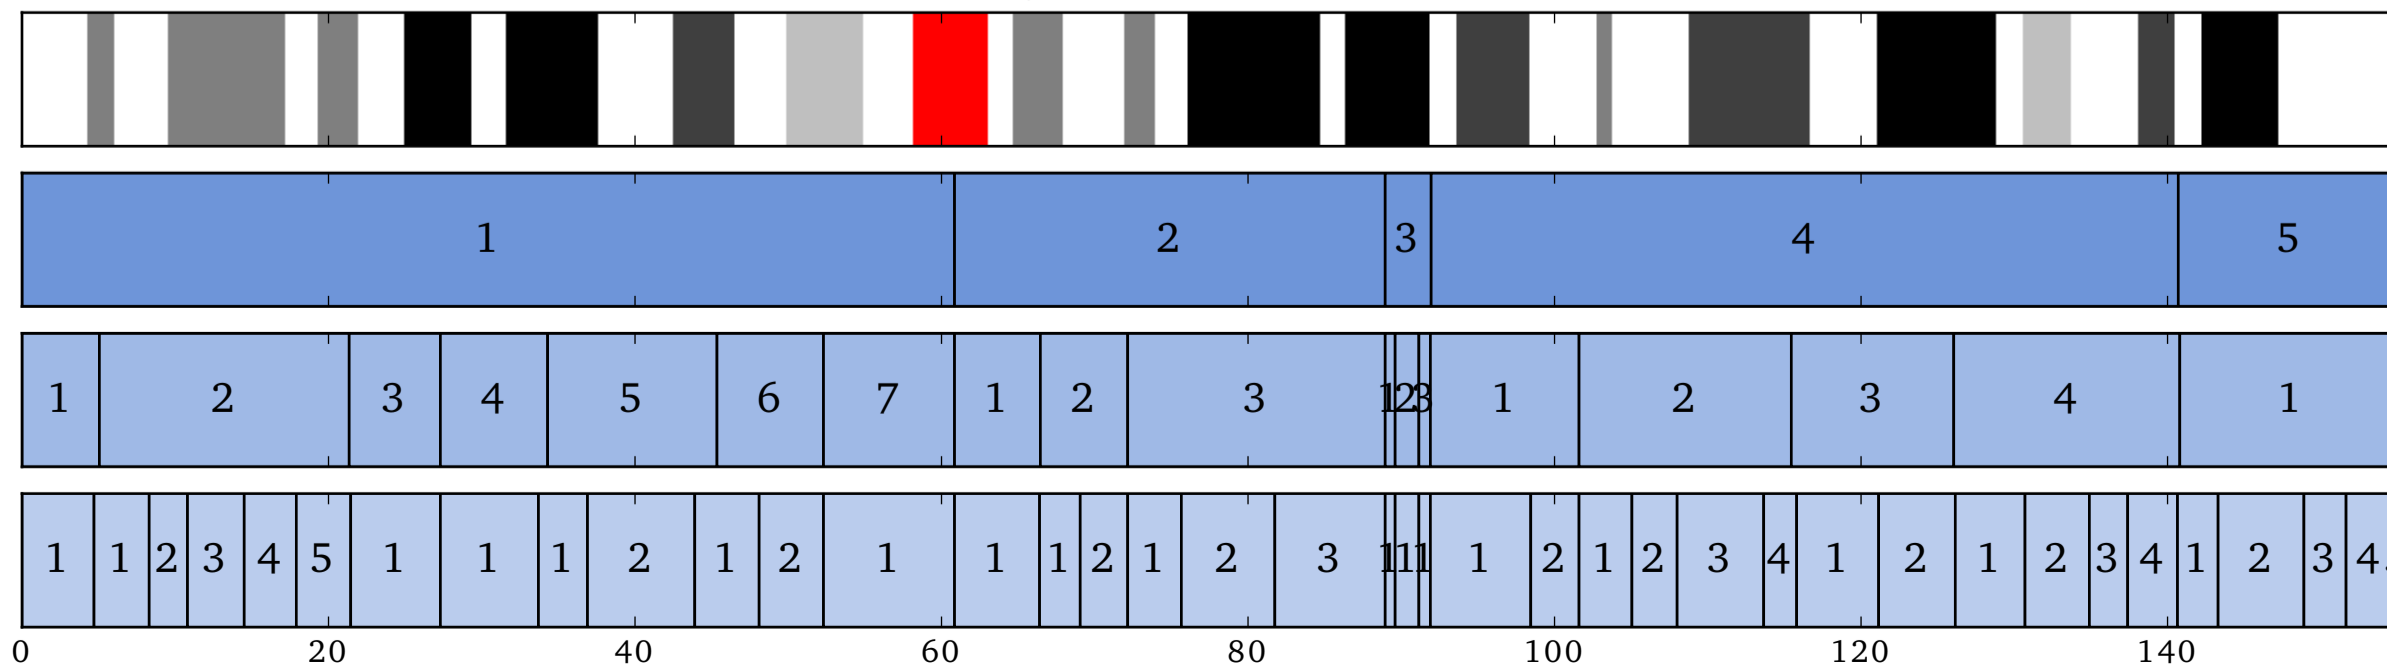

locus [Mbp]
