# Supplementary material for: Exploring chromatin hierarchical organization via Markov State Modelling
Source: PubMed Central journal article supplement (PMC6355033; doi:10.1371/journal.pcbi.1006686), 2018-12-31

Chromosome c

Chromosome c'

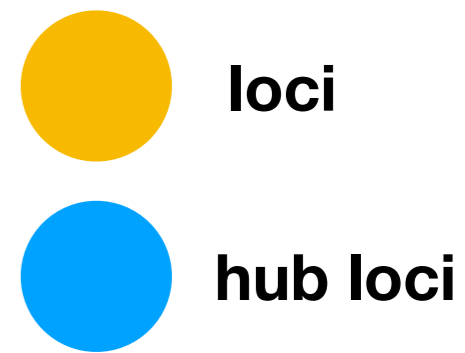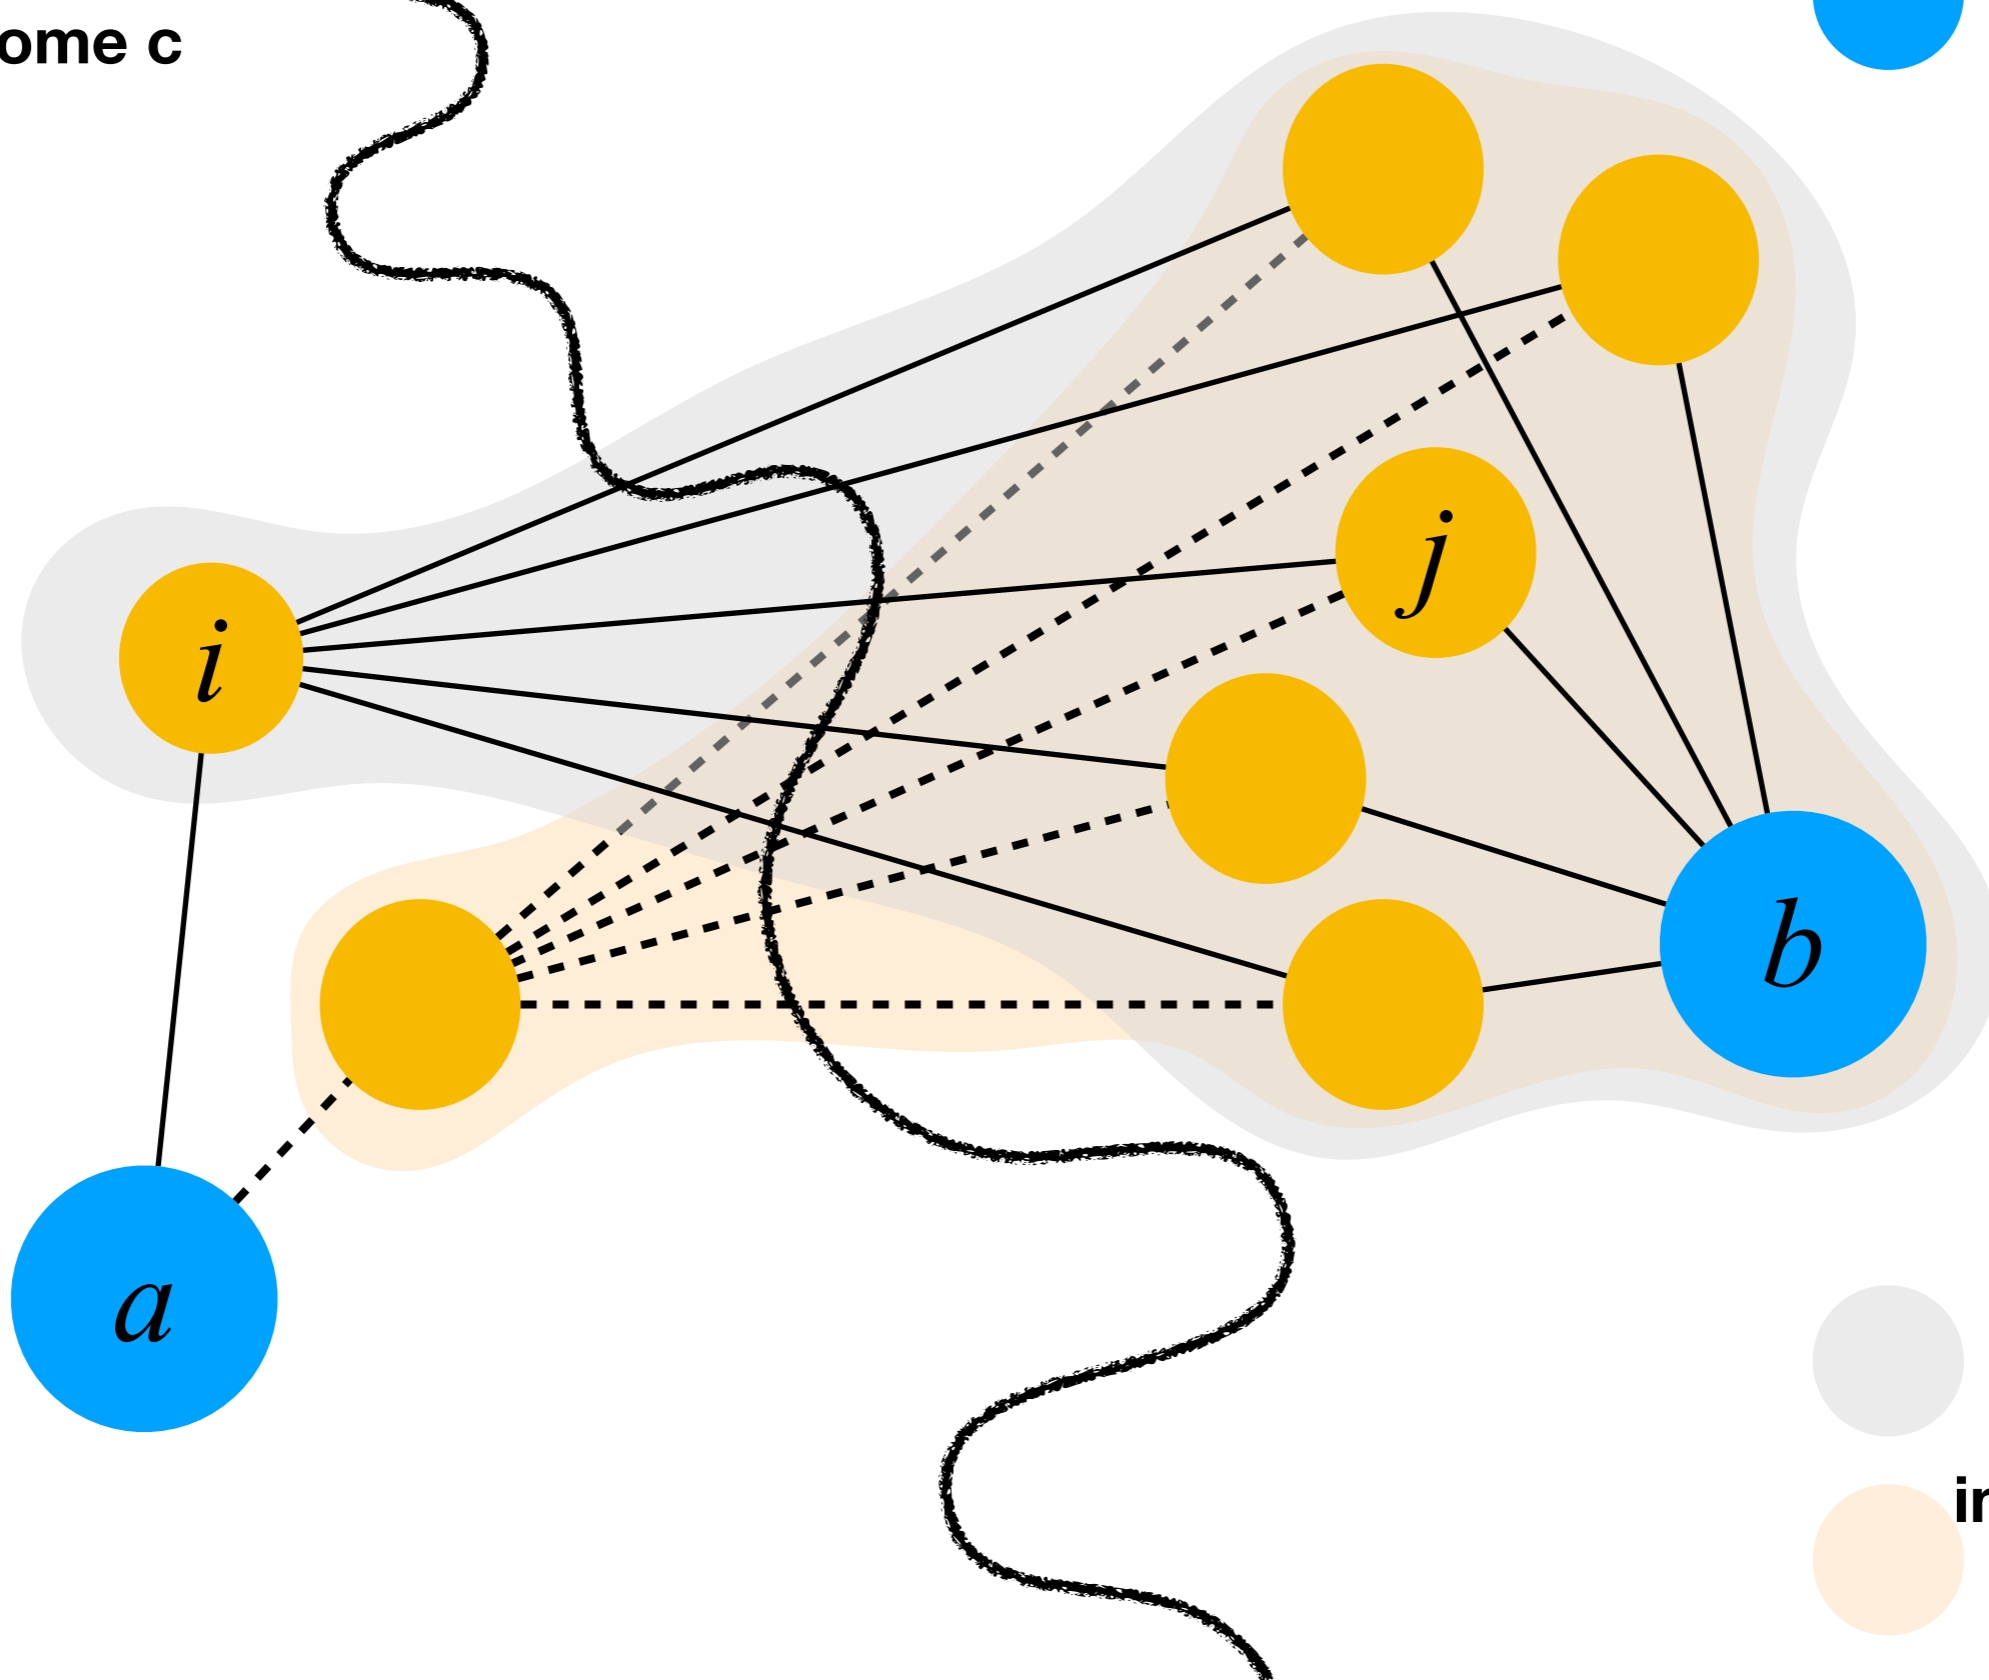

Supplement: pcbi.1006686.s002.pdf [file pcbi.1006686.s002.pdf]
