# Supplementary material for: Exploring chromatin hierarchical organization via Markov State Modelling
Source: PubMed Central journal article supplement (PMC6355033; doi:10.1371/journal.pcbi.1006686), 2018-12-31

A

### Soft-partitioning

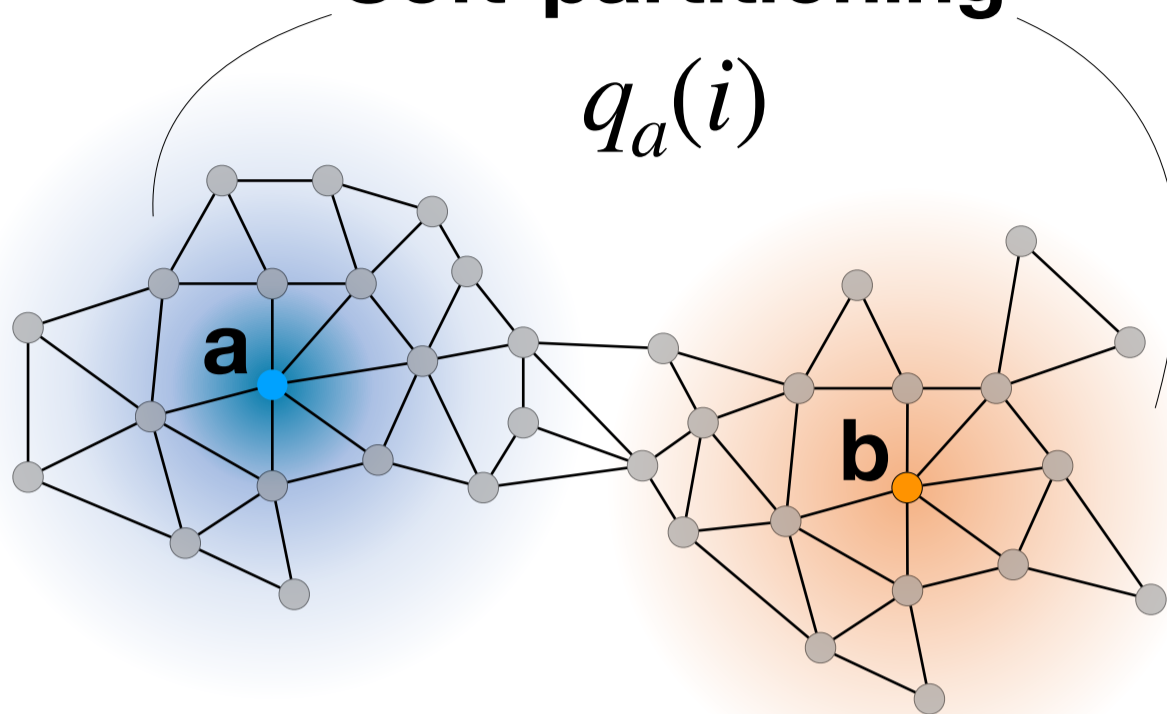

B

### Hard-partitioning

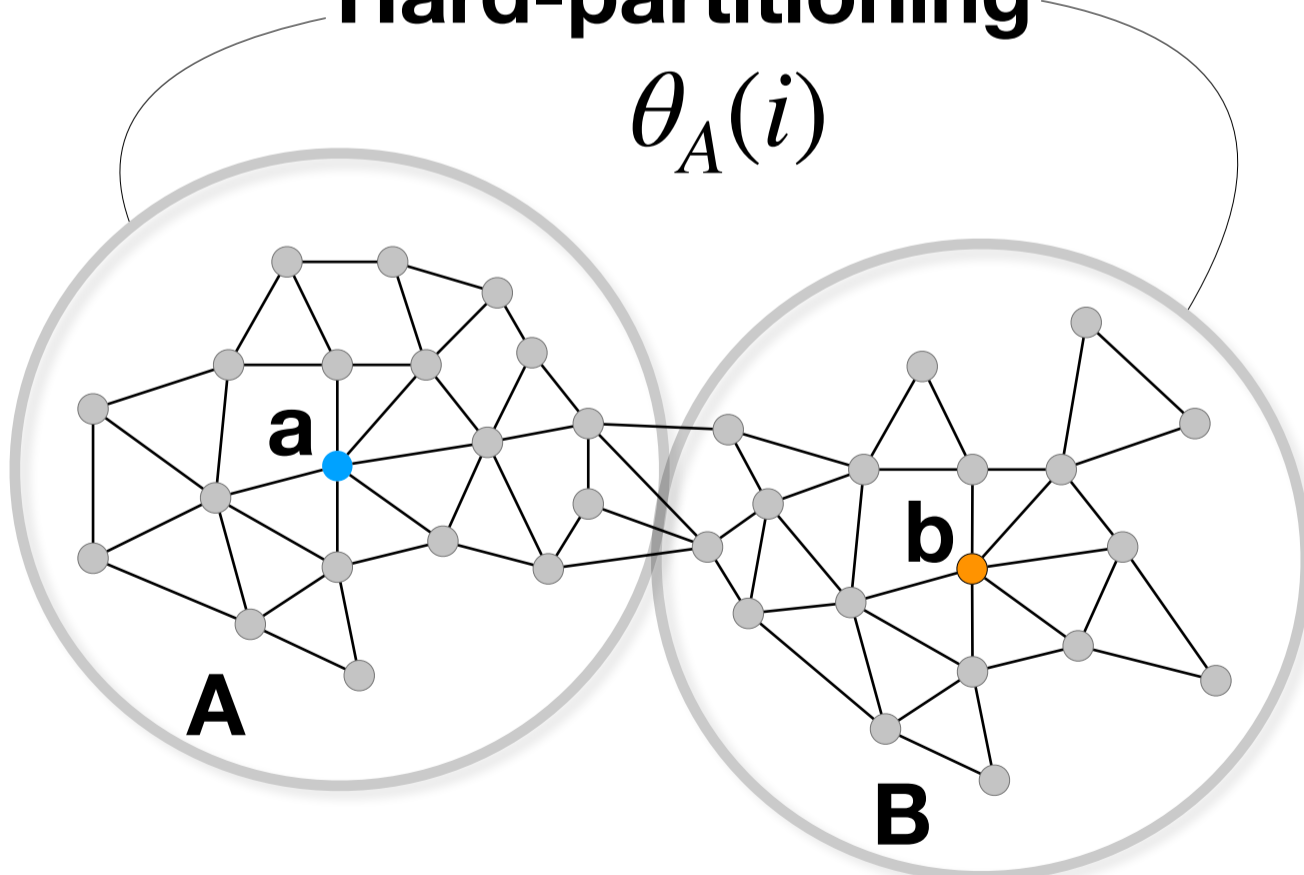

Supplement: pcbi.1006686.s009.pdf [file pcbi.1006686.s009.pdf]
