# Supplementary material for: Exploring chromatin hierarchical organization via Markov State Modelling
Source: PubMed Central journal article supplement (PMC6355033; doi:10.1371/journal.pcbi.1006686), 2018-12-31

Chromosome 1,  $\rho_{\mathcal{M}} < 0.5$

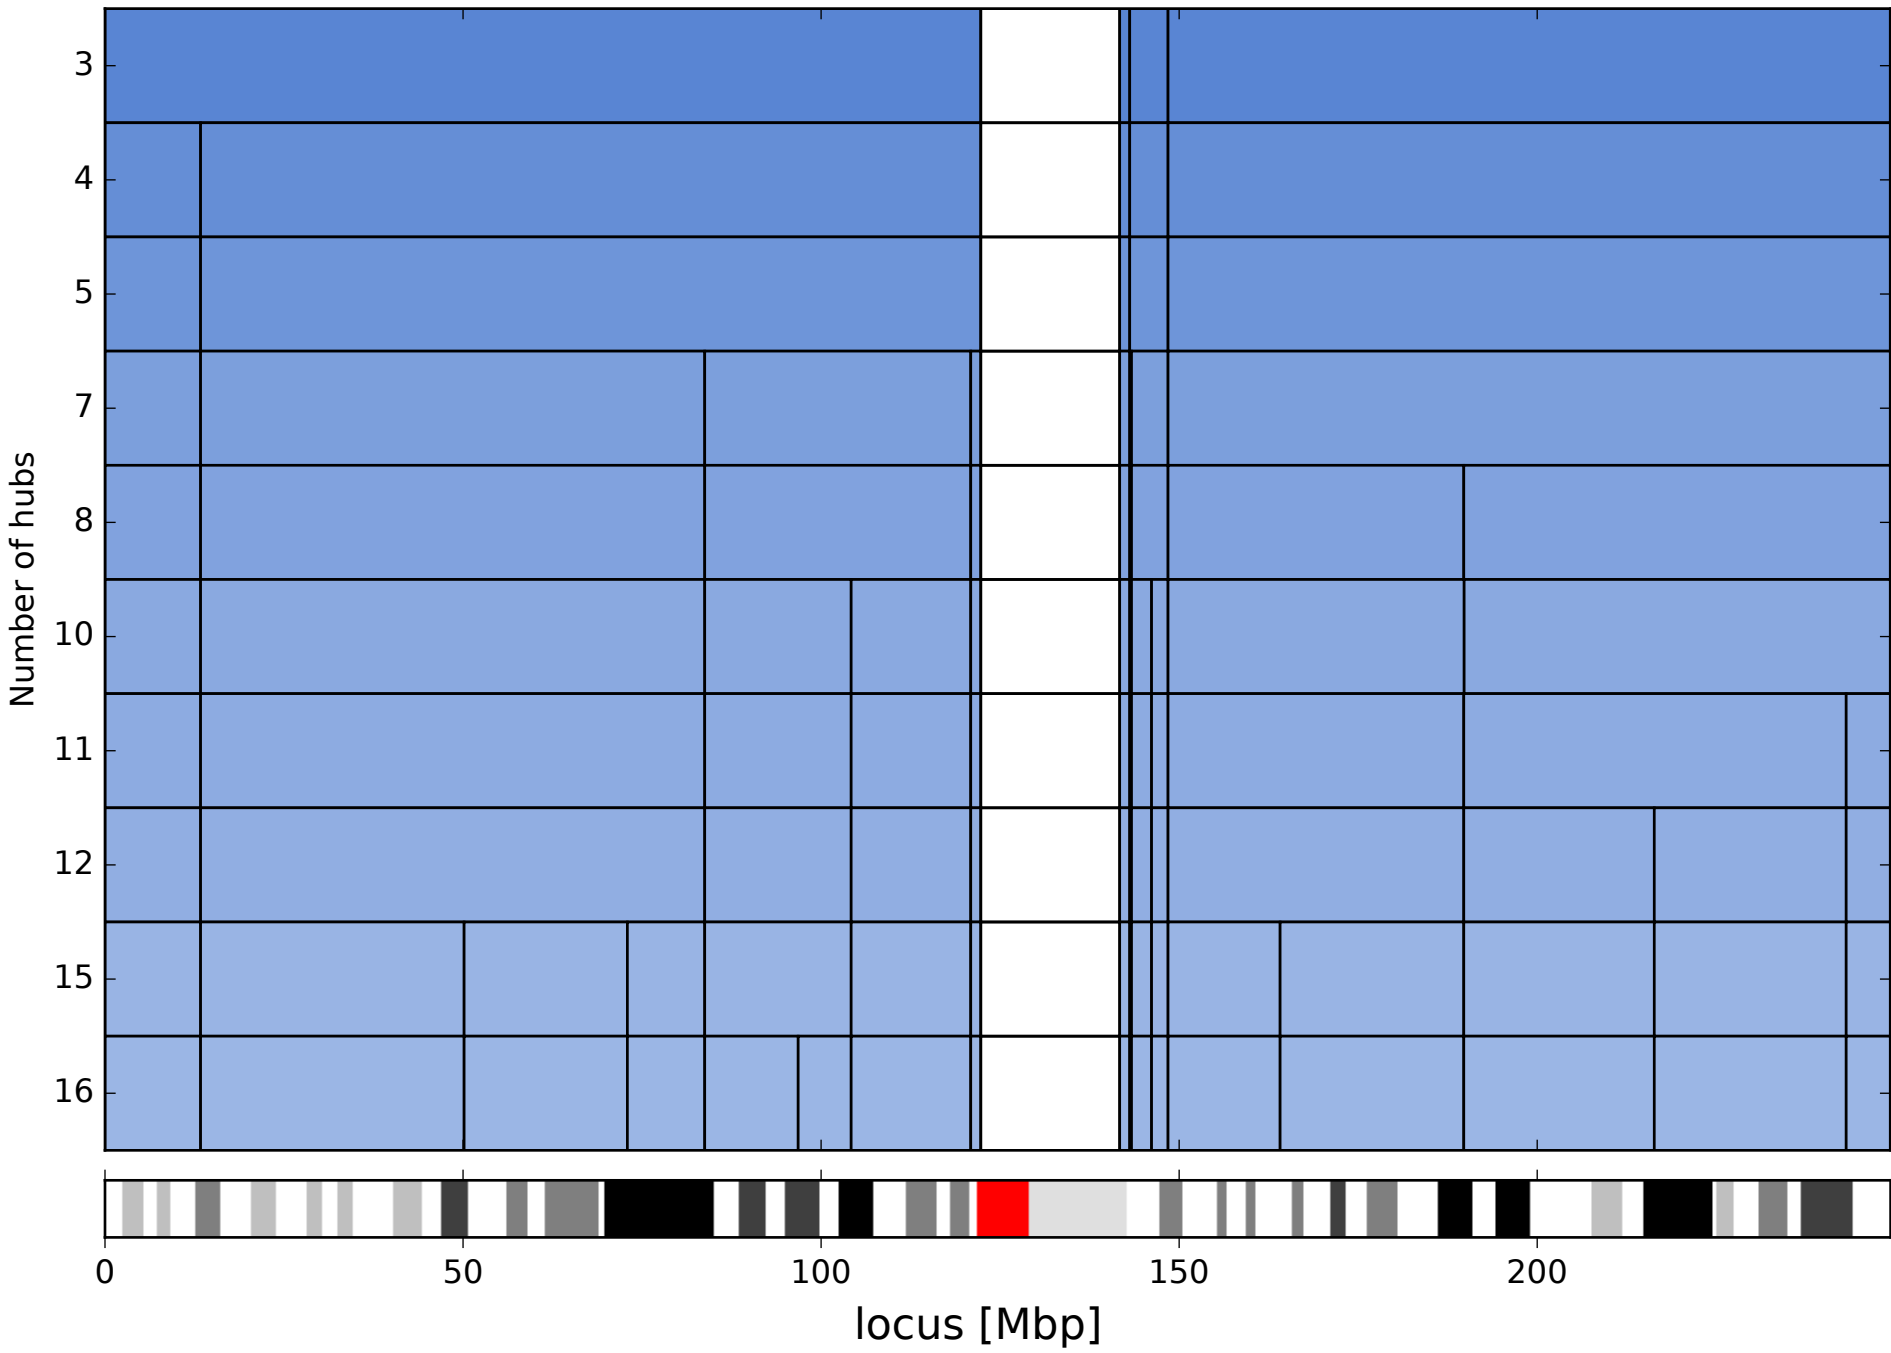





# Chromosome 1, $\rho_{\mathcal{M}} < 0.8$

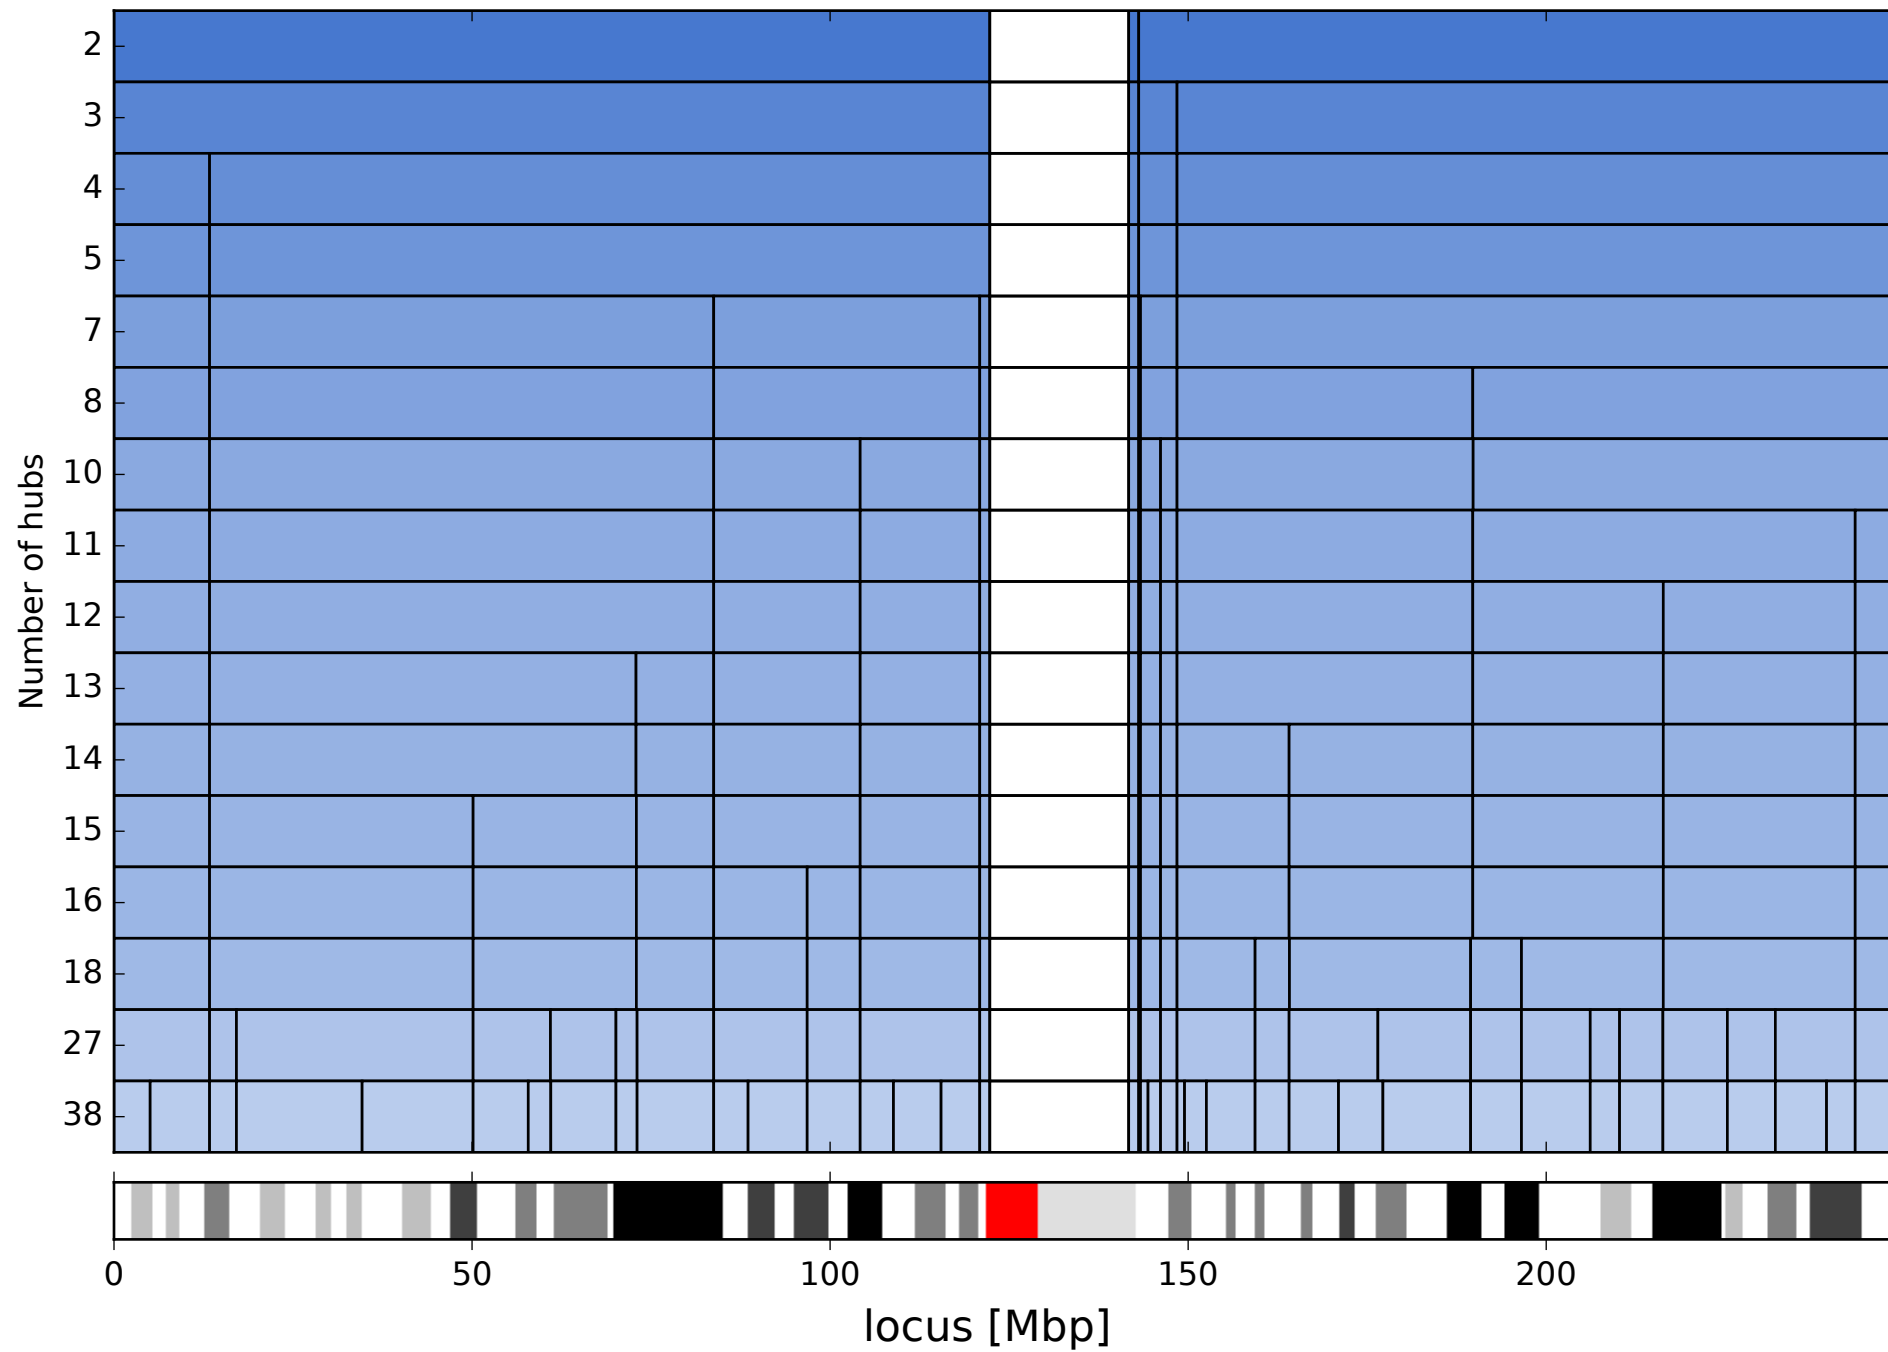

# Chromosome 17, $\rho_M < 0.8$

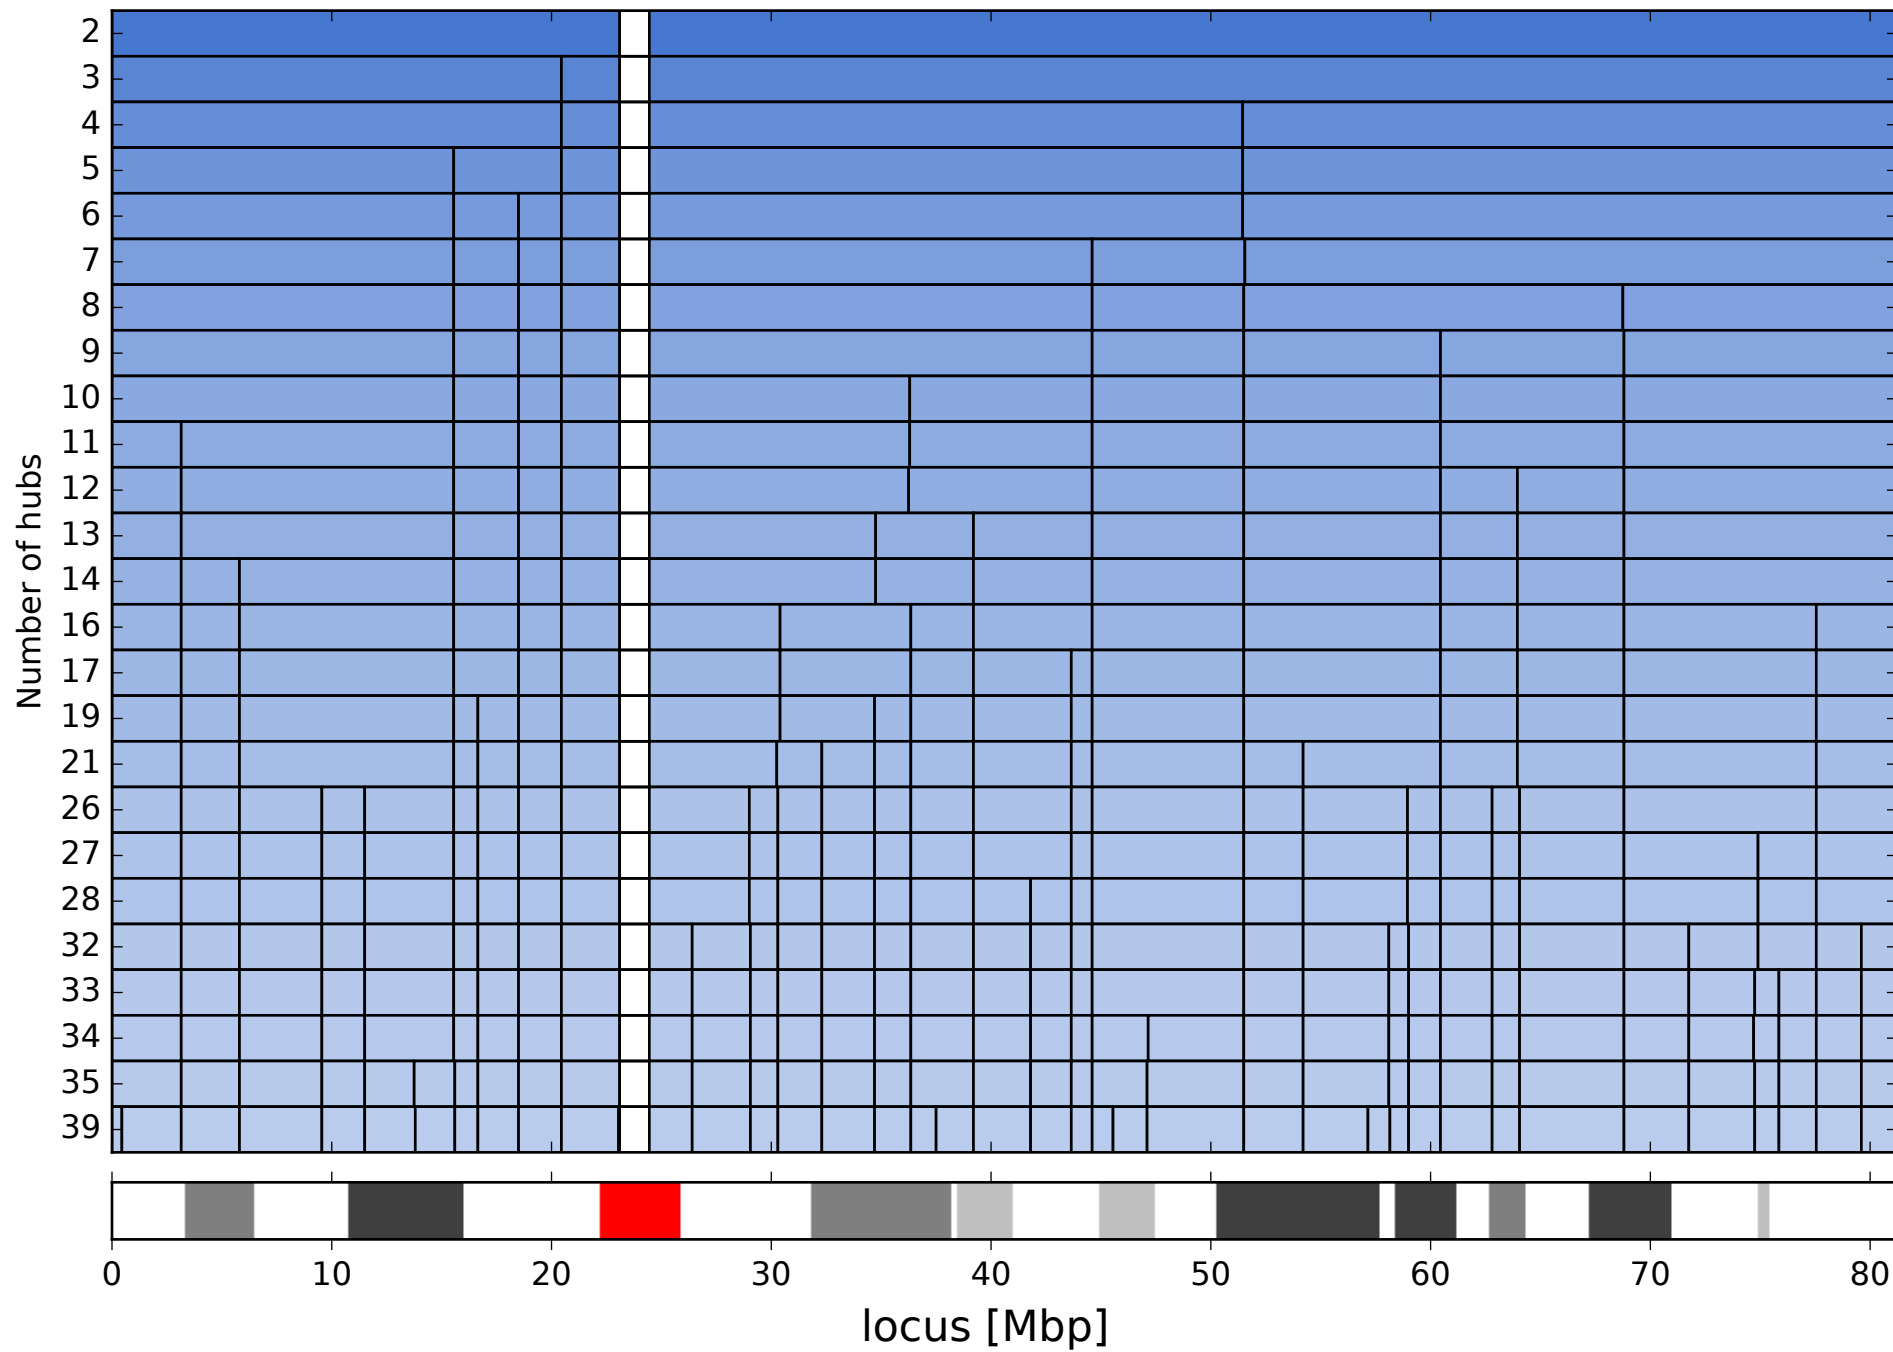

# Chromosome 20, $\rho_{\mathcal{M}} < 0.8$

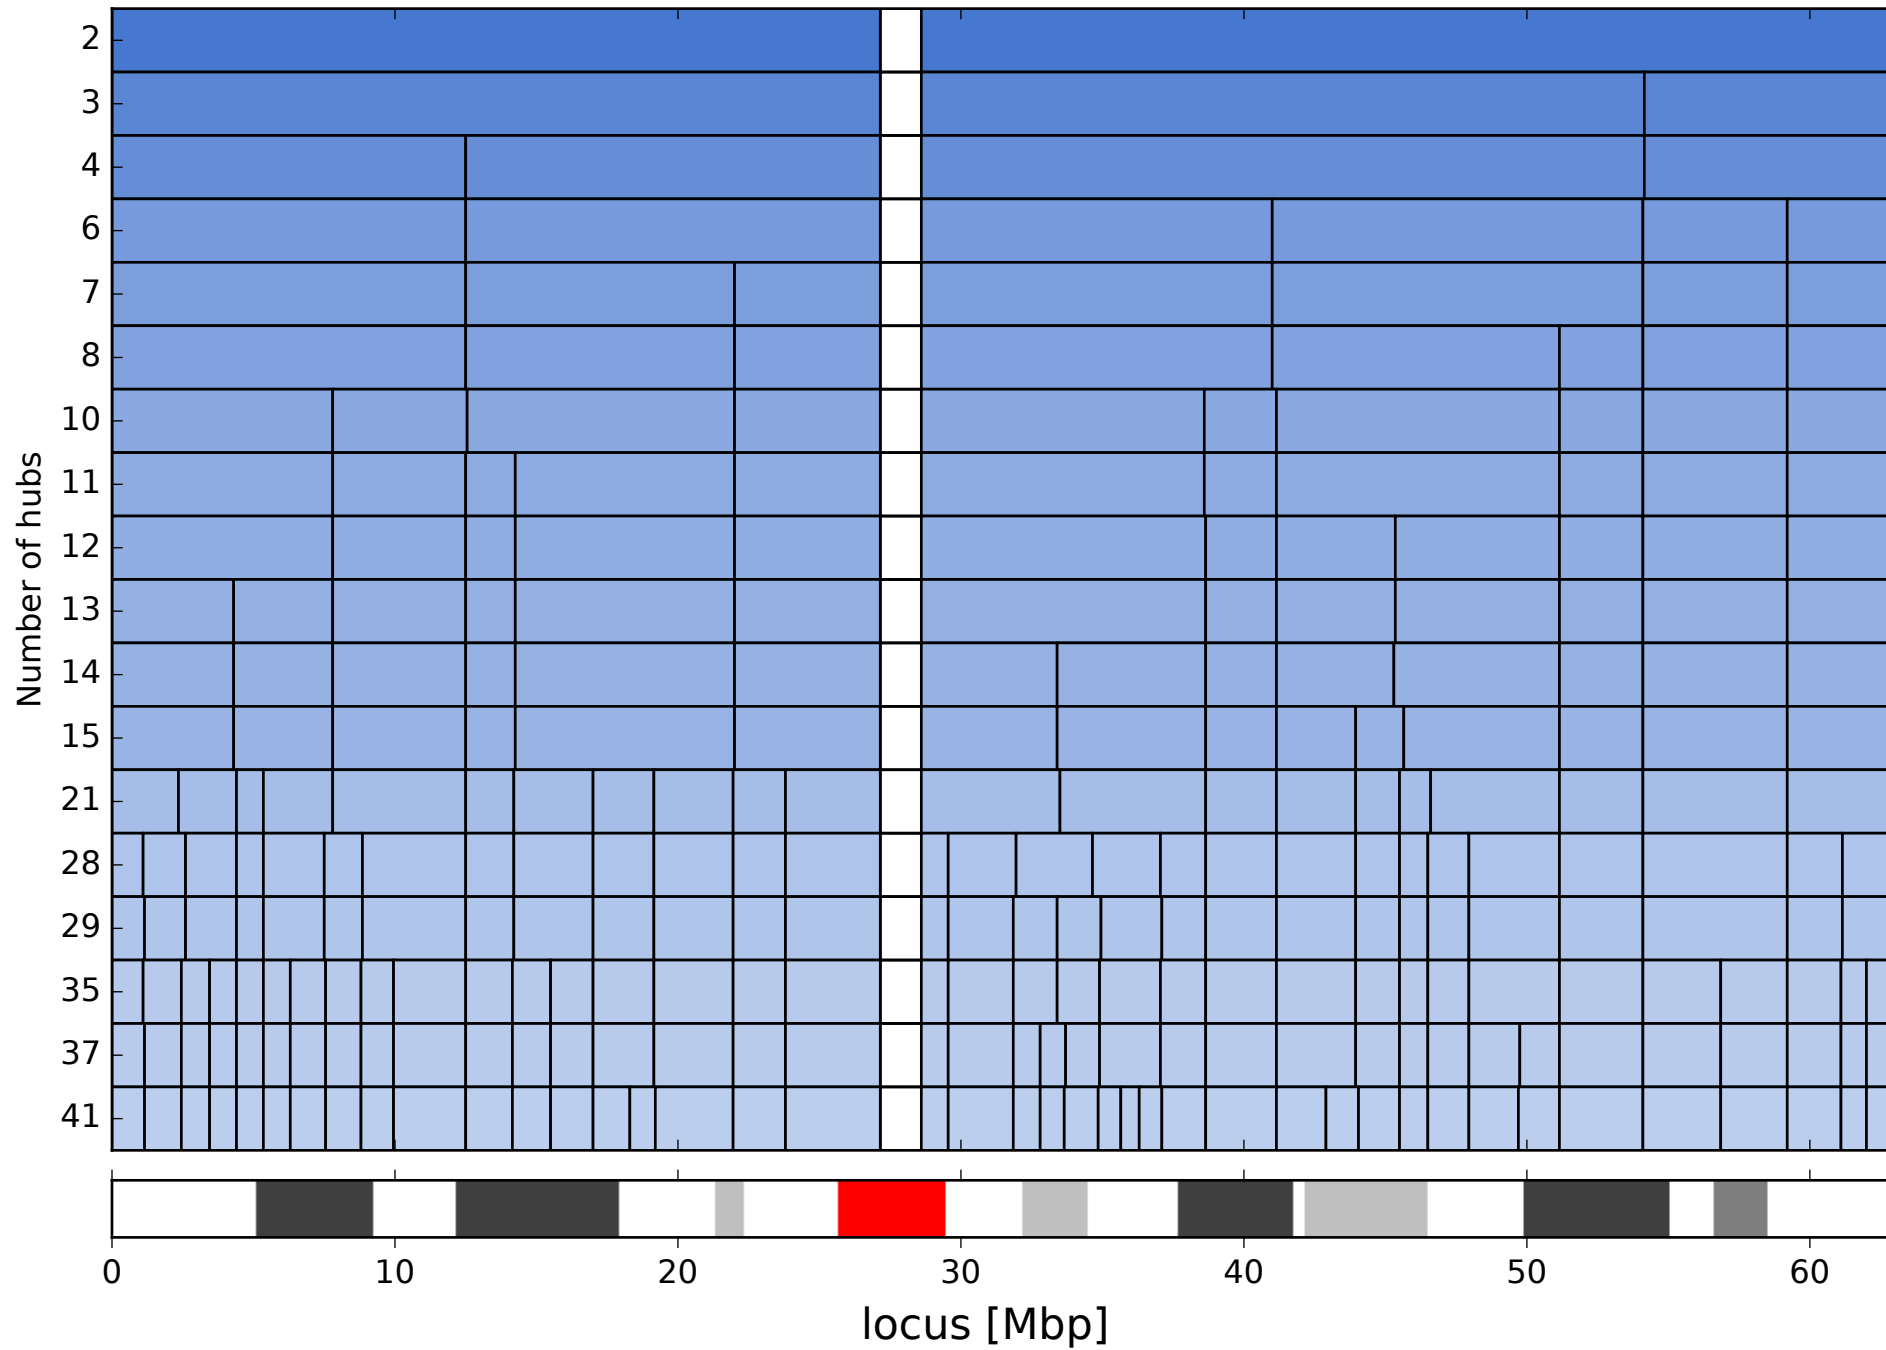

Supplement: pcbi.1006686.s010.pdf [file pcbi.1006686.s010.pdf]
