# Supplementary material for: Exploring chromatin hierarchical organization via Markov State Modelling
Source: PubMed Central journal article supplement (PMC6355033; doi:10.1371/journal.pcbi.1006686), 2018-12-31
Supplement: pcbi.1006686.s019.pdf [file pcbi.1006686.s019.pdf]

|                   |          | Core joints |         |        |        |        |        |        |        |        |        |        |
|-------------------|----------|-------------|---------|--------|--------|--------|--------|--------|--------|--------|--------|--------|
|                   |          | 1-2.1.2     | 1-2.1.3 | 14-3.4 | 17-1.2 | 17-4.1 | 17-4.2 | 17-5.4 | 19-1.1 | 19-4.1 | 20-3.3 | 22-6   |
| Peripheral joints | 2-1.2.1  | Red         | Orange  | Red    |        |        |        |        |        |        |        | Orange |
|                   | 2-5.2.2  |             |         | Orange |        |        |        |        |        |        |        |        |
|                   | 2-5.4.1  |             |         | Orange |        |        |        |        |        |        |        |        |
|                   | 2-5.4.3  | Red         |         |        |        |        |        |        |        |        |        |        |
|                   | 3-1.1.3  | Red         |         | Red    |        |        |        |        |        |        |        |        |
|                   | 3-2.2.2  | Red         | Red     | Red    |        | Orange | Red    | Orange | Orange |        |        | Red    |
|                   | 3-4.2.5  |             |         | Red    |        |        |        |        |        |        |        |        |
|                   | 6-1.4.3  | Red         | Orange  | Orange |        |        |        | Orange |        |        |        | Red    |
|                   | 8-6.2.1  | Red         |         |        |        |        |        | Red    |        |        |        | Red    |
|                   | 9-5.6.3  | Red         | Red     | Orange |        |        | Orange | Red    |        |        |        | Red    |
|                   | 9-5.6.4  | Orange      |         |        |        |        |        |        |        |        |        |        |
|                   | 10-3.4.1 | Red         |         | Red    |        |        |        |        |        |        |        | Red    |
|                   | 11-5.1.3 | Red         |         |        |        |        |        | Red    | Orange |        |        | Red    |
|                   | 11-5.2.1 | Red         | Red     | Red    |        |        |        | Red    | Orange |        |        | Red    |
|                   | 11-6.3.3 | Red         |         | Red    |        |        |        |        |        |        |        |        |
|                   | 12-3.1.3 |             | Orange  | Red    |        |        |        | Orange |        |        |        | Red    |
|                   | 12-5.4.2 | Red         |         |        |        |        |        |        |        |        |        |        |
|                   | 13-2.1   |             |         | Orange |        |        |        |        |        |        |        |        |
|                   | 13-4.1   |             |         | Orange |        |        |        |        |        |        |        |        |
|                   | 15-4.2   | Red         |         | Red    |        |        |        |        |        |        |        | Red    |
| 15-4.5            | Red      | Red         | Red     |        |        | Orange |        | Orange |        |        |        |        |
| 15-4.6            | Red      | Red         | Red     |        | Red    | Orange | Red    |        |        | Orange | Red    |        |
| 18-1.1            |          |             | Red     | Red    |        |        |        |        |        |        | Red    |        |
| 18-1.1            |          |             | Red     | Red    | Red    |        |        |        |        |        | Red    |        |
