# Supplementary material for: Exploring chromatin hierarchical organization via Markov State Modelling
Source: PubMed Central journal article supplement (PMC6355033; doi:10.1371/journal.pcbi.1006686), 2018-12-31
Supplement: pcbi.1006686.s021.pdf [file pcbi.1006686.s021.pdf]

| Partition1 | Partition2 | Cab  | H3K4Me1 | H3K4Me3 | H3K27Ac | H3K27Me3 | H3K9Ac | H3K9Me3 | POL2 | POL3 | CTCF | RAD21 | SMC3 | RUNX3 | DNase |
|------------|------------|------|---------|---------|---------|----------|--------|---------|------|------|------|-------|------|-------|-------|
| 9-5.6.3    | 17-4.2     | 1.18 | █       |         |         |          | █      |         |      |      | █    | █     |      |       | █     |
| 1-2.1.2    | 17-4.2     | 1.06 | █       | █       |         |          | █      |         |      |      | █    | █     |      |       | █     |
| 1-2.1.2    | 9-5.6.3    | 1.23 | █       |         | █       |          | █      |         |      |      | █    | █     |      |       | █     |
| 1-2.1.2    | 9-5.6.4    | 1.35 |         |         | █       |          | █      |         |      |      | █    | █     |      |       | █     |
| 9-5.6.3    | 17-5.4     | 1.14 | █       |         | █       |          |        |         |      |      |      | █     |      |       | █     |
| 11-5.1.3   | 17-5.4     | 1.81 | █       |         | █       |          |        |         |      |      |      | █     |      |       | █     |
| 16-5.6     | 17-5.4     | 1.25 |         |         | █       |          |        |         |      |      |      | █     |      |       | █     |
| 17-4.2     | 19-1.1     | 1.77 |         |         |         |          |        |         |      |      | █    | █     |      |       | █     |
| 16-1.1     | 19-1.1     | 3.58 |         |         |         |          |        |         |      |      | █    | █     |      |       | █     |
| 11-5.1.3   | 19-1.1     | 2.72 |         |         |         |          |        |         |      |      | █    | █     |      |       | █     |
| 17-4.2     | 22-6       | 1.17 |         | █       |         |          |        |         |      |      |      | █     |      |       | █     |
| 11-5.1.3   | 22-6       | 1.14 |         | █       |         |          |        |         |      |      |      | █     |      |       | █     |
| 8-6.2.1    | 17-5.4     | 1.06 |         |         |         |          |        |         |      |      |      | █     |      |       | █     |
| 16-1.1     | 17-5.4     | 1.99 |         |         |         |          |        |         |      |      |      | █     |      |       | █     |
| 17-5.4     | 19-1.1     | 2.44 |         |         |         |          |        |         |      |      |      | █     |      |       | █     |
| 17-5.4     | 22-6       | 1.26 |         |         |         |          |        |         |      |      |      | █     |      |       | █     |
| 19-1.1     | 22-6       | 1.68 |         |         |         |          |        |         |      |      |      | █     |      |       | █     |
| 16-1.1     | 22-6       | 1.24 |         |         |         |          |        |         |      |      |      | █     |      |       | █     |
| 19-2.2     | 22-6       | 1.11 |         |         |         |          |        |         |      |      |      | █     |      |       | █     |
| 17-5.4     | 19-2.2     | 1.08 |         |         |         |          |        |         |      |      |      | █     |      |       | █     |
| 19-3.3     | 22-6       | 1.04 |         |         |         |          |        |         |      |      |      | █     |      |       | █     |
| 19-4.1     | 22-6       | 1.20 |         |         |         |          |        |         |      |      |      | █     |      |       | █     |
| 17-4.2     | 19-4.1     | 1.14 |         |         |         |          |        |         |      |      |      | █     |      |       | █     |
| 17-5.4     | 19-4.1     | 1.19 |         |         |         |          |        |         |      |      |      | █     |      |       | █     |
| 16-1.1     | 19-4.1     | 2.11 |         |         |         |          |        |         |      |      |      | █     |      |       | █     |
| 11-5.1.3   | 19-4.1     | 1.55 |         |         |         |          |        |         |      |      |      | █     |      |       | █     |
| 17-1.2     | 22-6       | 1.23 |         |         |         |          |        |         |      |      |      | █     |      |       | █     |
| 17-1.2     | 19-4.1     | 1.07 |         |         |         |          |        |         |      |      |      | █     |      |       | █     |
| 17-1.2     | 19-1.1     | 1.38 |         |         |         |          |        |         |      |      |      | █     |      |       | █     |
| 16-1.1     | 17-1.2     | 1.19 |         |         |         |          |        |         |      |      |      | █     |      |       | █     |
